1 **Dihydroartemisinin broke immune evasion through YAP1/JAK1/STAT1, 3**  
2 **pathways to enhance anti-PD-1 therapy in hepatocellular carcinoma**

3 Qing Peng#, Shenghao Li#, Xinli Shi\*, Yinglin Guo, Liyuan Hao, Zhiqin Zhang,

4 Jingmin Ji, Yanmeng Zhao, Caige Li, Yu Xue, Yiwei Liu

5 Department of Pathobiology and Immunology, Hebei University of Chinese Medicine,

6 Shijiazhuang 050200, China

7

8 #These authors contributed equally to this work.

9 \*Author for correspondence: Xinli Shi, Department of Pathobiology and Immunology,

10 Hebei University of Chinese Medicine, No.3 Xingyuan Road, Shijiazhuang, Hebei

11 050200, China

12 Tel: +86-0311-89926237; E-mail: [sxlsunshine@sina.com](mailto:sxlsunshine@sina.com)

13

14

15

16

17

18

19

20

21

22 **Abstract**

23 The efficacy of anti-PD-1 therapy is not as expected in patients with hepatocellular carcinoma  
24 (HCC). Yes-associated protein 1 (YAP1) was overexpressed and activated in HCC. This study  
25 aimed to investigate the potential mechanism and inhibitor of YAP1 on immune evasion, and  
26 promote anti-PD-1 therapy in HCC. Here, we showed that dihydroartemisinin (DHA), an FDA  
27 approved drug, directly suppressed YAP1 expression, leading to break immune evasion in liver  
28 tumor niche, characterized by decreased PD-L1 in liver tumor cells and increased CD8<sup>+</sup> T cell  
29 infiltration. Mechanismly, YAP1 is not only directly related to PD-L1, but also involved in  
30 activating the JAK1/STAT1, 3 pathways. Moreover, *Yap1* knockout elevated CD4<sup>+</sup> and CD8<sup>+</sup> T  
31 cells in liver tumor niche of *Yap1*<sup>LKO</sup> mice. Consistently, verteporfin, YAP1 inhibitor, decreased  
32 TGF-β in liver tumor niche and exhausted CD8<sup>+</sup>T cells in spleen. Furthermore, DHA combined  
33 with anti-PD-1 treatment promoted CD4<sup>+</sup> T cell infiltration in the spleen and CD8<sup>+</sup> T cells in  
34 tumor tissues. Thus, we provide a new combined therapeutic strategy for anti-PD-1 with DHA, a  
35 potent YAP1 inhibitor, in HCC.

36 **Keywords:** Hepatocellular carcinoma; YAP1; Dihydroartemisinin; STAT3; PD-L1

37

38

39

40

41

42

## 43 **Introduction**

44 Hepatocellular carcinoma (HCC) is the fourth most common cause of cancer-related death in  
45 the world (Lei et al. 2019). Immune checkpoint inhibitor (ICI) therapy, particularly antibodies  
46 targeting the programmed cell death-1 (PD-1)/programmed cell death ligand-1(PD-L1) pathway,  
47 has shed light on the survival of HCC patients. However, the objective response rate is only ~20%  
48 during PD-1/PD-L1 blockade therapy in cancers (Xu-Monette et al. 2017). In the tumor  
49 microenvironment, PD-L1 on tumor cells is a key transmembrane molecule that governs the  
50 crosstalk with tumor-infiltrating CD8<sup>+</sup> cytotoxic T lymphocytes (CTLs), which played an  
51 important role in the ICI therapy.

52 PD-L1 is highly expressed in HCC tissues compared to adjacent tissues, which positively  
53 correlated with poor prognosis and invasion (Calderaro et al. 2016). PD-L1 on liver tumor cells is  
54 induced by interferon gamma (IFN- $\gamma$ ) secreted from CD8<sup>+</sup> CTLs in tumor microenvironment,  
55 drives T cell exhaustion, and forms a negative feedback loop, leading to immune evasion (Huang  
56 et al. 2017). Therefore, there is an urgent need to develop the mechanism negatively regulates  
57 PD-L1 expression in HCC.

58 Yes-associated protein 1 (YAP1), a key effector in Hippo pathway, directly binds to PD-L1  
59 promoter and promotes PD-L1 transcription in lung cancer PC9 cells (Lee et al. 2017).  
60 Overexpression and nuclear localization of YAP1 is about 50% in HCC clinical specimens (Li, Li,  
61 and Zhou 2017). YAP1 overexpression recruits inhibitory immunocyte including tumor associated  
62 macrophages (tumor-associated macrophages (TAMs), M2 type) (Guo et al. 2017),  
63 myeloid-derived suppressor cells (MDSCs) (Wang et al. 2016) and Tregs (Fan et al. 2017). In

64 addition, the phosphorylation STAT1 (T727) or STAT3 (Y705) also bound to the PD-L1 promoter  
65 and induced PD-L1 expression (Sasidharan Nair et al. 2018). However, the relationship between  
66 YAP1 and STAT1, 3 in regulating PD-L1 of HCC remains unclear.

67 Dihydroartemisinin (DHA), approved by FDA as an anti-malarial drug, is a derivative of  
68 artemisinin extracted from *artemisia annua*. In addition, DHA inhibited the expression of PD-L1  
69 by inhibiting TGF- $\beta$ , STAT3 and PI3K/AKT signaling pathways in non-small cell lung cancer  
70 (Zhang et al. 2020). Our previous study showed that DHA inhibited cell proliferation in human  
71 hepatocellular carcinoma HepG2215 cells (Shi et al. 2019) and promoted p-STAT3 (Y705) nuclear  
72 localization in human tongue squamous cell carcinoma Cal-27 cells (Shi et al. 2017). However,  
73 the relationship between DHA and YAP1 in the immune microenvironment is unknown in HCC.

74 Here we showed that the anti-PD-1 treatment increased YAP1 expression in liver tumor cells  
75 and the exhausted CD4<sup>+</sup> and CD8<sup>+</sup> T cells in blood and spleen. YAP1 knockdown/knockout  
76 decreased PD-L1 expression and promoted CD8<sup>+</sup> T cells infiltration in liver tumor niche.  
77 Mechanistically, YAP1 prompted PD-L1 expression by JAK1/STAT1, 3 pathways in liver tumor  
78 cells. Interestingly, DHA acted as YAP1 inhibitor and enhanced the effect of anti-PD-1 therapy in  
79 HCC.

## 80 **Results**

### 81 **YAP1 expressed differently in tumor and para-tumor tissues from HCC patients.**

82 We investigated the expression patterns of YAP1 in different tumors by TIMER database.  
83 *YAP1* was upregulated in CHOL, COAD, GBM, LIHC and STAD (Fig. 1A). However, *YAP1* was  
84 downregulated in BLCA, BRCA, KICH, KIRC, KIRP, LUAD, LUSC, PCPG, PRAD and UCEC

85 (Fig. 1A). The result showed that YAP1 had different expression patterns in different tumors. Next,  
86 the TCGA database showed that *YAP1* was also upregulated and constantly increased in HCC  
87 tumor tissues of different stages compared with normal tissues (Fig. 1B). In addition, the  
88 expressions of YAP1 in tumor and para-tumor tissues were analyzed by the clinical tissue  
89 microarray. Representative pictures of YAP1 expression ranged from negative to moderately  
90 positive ( Fig. 1C ) . The data showed that YAP1 (Supplementary Table 2) had no correlation with  
91 sex, age, histological grade, maximum diameter of tumor (cm), intrahepatic satellite focus,  
92 lymphatic metastasis, extrahepatic metastasis, virus infection, HBV and cirrhosis ( $P>0.05$ ).  
93 Notably, some study showed the survival of tumor cells depended on the relative activity of YAP1  
94 in tumor cells and their surrounding tissues (Moya et al. 2019). We found that the ratio of YAP1  
95 score (para-tumor/tumor tissues) was significantly negatively correlated with the expression of  
96 YAP1 in tumor tissues ( $R=-0.64$ ,  $P=0.001$ ) (Fig. 1D, Fig. S1). Thus, different expressions of YAP1  
97 were in HCC tumor and para-tumor tissues.

#### 98 **DHA inhibited YAP1 expression in liver tumor cells of mice.**

99 Our previous study showed DHA inhibited cell growth in HepG2(Hao et al. 2021) and  
100 HepG2215 cells (Shi et al. 2019). To further study the effect of DHA on liver tumor *in vivo*,  
101 C57BL/6 mice with liver tumors *in situ* were induced by DEN/TCPOBOP (Li et al. 2020,  
102 Bergmann et al. 2017). We observed that DHA reduced tumor volume and liver index, but had no  
103 significant effect on serum ALT and body weight (Fig. 2A). These results suggested that DHA  
104 inhibit liver tumor growth *in vivo*. Moreover, DHA reduced YAP1 expression in the tumor tissues,  
105 consistent with that of verteporfin group (Fig.2B). The result suggested that DHA suppressed

106 YAP1 expression in liver tumor. We also showed that anti-PD-1 decreased the tumor volume, liver  
107 index and ALT in serum (Fig. 2A). However, we found that anti-PD-1 increased YAP1 expression  
108 in tumor and para-tumor tissues compared with DMSO (Fig. 2B). These results supported that  
109 anti-PD-1 promoted YAP1 expression in tumor cells. Notably, tumor volume was reduced in DHA  
110 combined with anti-PD-1 group (mark as DHA +anti-PD-1) compared with DHA or anti-PD-1  
111 group alone (Fig. 2A). The result suggested that DHA promoted anti-PD-1 treatment effect *in vivo*.  
112 Interestingly, YAP1 expression decreased in tumor, while increased para-tumor tissues compared  
113 with DMSO (Fig. 2B).

114 Tumor growth depends on the relative activity of YAP1 in tumor and para-tumor tissues  
115 (Moya et al. 2019). We observed that the ratio of YAP1 expression (para-tumor /tumor tissues)  
116 was also increased in DHA, DHA+anti-PD-1, and verteporfin groups compared with DMSO (Fig.  
117 2B). These data suggested that the ratio of YAP1 expression can better represent the effect of DHA  
118 treatment on tumor growth than YAP1 expression in tumors.

#### 119 ***Yap1* knockout inhibited liver tumor growth *in vivo*.**

120 *Yap1*<sup>LKO</sup> mice were knockout exon 3 of the *Yap1* gene in liver cells by CRISPR/Cas9 (Fig.  
121 3A). Then, DEN/TCPOBOP was used to induce liver tumor in *Yap1*<sup>flx/flx</sup> and *Yap1*<sup>LKO</sup> mice  
122 (Bergmann et al. 2017, Li et al. 2012). *YAP1* knockout decreased the maximal tumor size and the  
123 numbers of macroscopic tumors in *Yap1*<sup>LKO</sup> mice (Fig. 3B). Meanwhile, liver index decreased,  
124 spleen index increased, but kidney index did not change significantly in *Yap1*<sup>LKO</sup> mice (Fig. 3B).  
125 Consistently, YAP1 was mainly localized in nucleus of liver tumor cells in *Yap1*<sup>flx/flx</sup> mice (Fig.  
126 3C). Furthermore, Ki-67 reduced in *Yap1*<sup>LKO</sup> mice (Fig. 3C). These results indicated that *YAP1*

127 knockout inhibited liver tumor growth *in vivo*.

128 **DHA directly inhibited liver tumor growth through YAP1 in *Yap1*<sup>LKO</sup> mice.**

129 An increase in reactive oxygen species (ROS) may also contribute to YAP1 activation in human  
130 HCC cells (Cho et al. 2020). Our previous study showed that DHA promoted oxygen species  
131 (ROS) production in HepG2215 cells (Shi et al. 2019). Further, to verify whether DHA directly  
132 inhibited liver tumor growth through YAP1, we treated with DHA in *Yap1*<sup>LKO</sup> and *Yap1*<sup>flox/flox</sup> mice  
133 with liver tumors. We found that the numbers and maximal size of tumors (Fig. 4A) were reduced  
134 in DHA group (2.5±1.7mm) compared with DMSO group (6.0±3.6mm), and Ki67 expression was  
135 decreased (Fig. 4B) in *Yap1*<sup>flox/flox</sup> mice. The results showed that DHA inhibited the tumor growth.  
136 However, the maximal size (Fig. 4A) and Ki67 expression (Fig. 4B) showed no significant  
137 difference in DHA group compared with DMSO group in *Yap1*<sup>LKO</sup> mice, only tumor numbers  
138 decreased (Fig. 4A). Moreover, DHA treatment did not reduce the numbers and maximal size of  
139 tumors (Fig. 4A) in *Yap1*<sup>LKO</sup> mice compared with *Yap1*<sup>flox/flox</sup> mice, and little difference in Ki67  
140 expression (Fig. 4B) between the two groups. These results suggested that DHA directly inhibited  
141 tumor growth through YAP1.

142 DHA treatment significantly reduced YAP1 expression in *Yap1*<sup>flox/flox</sup> mice compared with  
143 DMSO (Fig. 4B). We detected that YAP1 expression was no significant difference between DHA  
144 and DMSO treated *Yap1*<sup>LKO</sup> mice (Fig. 4B). These results showed that DHA did not restore YAP1  
145 expression.

146 **YAP1 promoted PD-L1 to immune evasion by JAK1/STAT1, 3 pathways.**

147 YAP1 directly bind to the promoter of PD-L1 (Kim et al. 2018). To investigate the effect of

148 YAP1 on PD-L1, we knocked down *YAP1* by CRISPR/Cas9 in HepG2215 cells (Fig. 5A) (Li et al.  
149 2020). The downstream genes cellular communication network factor 1 (*CYR61*) and cellular  
150 communication network factor 2 (*CTGF*) were decreased in sh*YAP1*-HepG2215 cells (Fig. S2A).  
151 Interestingly, the expression of WW domain containing transcription regulator 1 (TAZ),  
152 transcriptional coactivator of YAP1 in Hippo pathway (Yu, Zhao, and Guan 2015), was not  
153 significantly altered in sh*YAP1*-HepG2215 cells (Fig. S2B). The result showed that YAP1  
154 knockdown did not affect TAZ expression.

155 Further, *YAP1* knockdown decreased PD-L1 expression in HepG2215 cells (Fig.5A),  
156 suggesting that YAP1 promoted PD-L1 expression. JAK1-STAT1 signaling is the main pathway  
157 responsible for IFN- $\gamma$  induced PD-L1 expression in HCC cells (Li et al. 2018). Meanwhile, YAP1  
158 interacted with TEA domain transcription factor (TEAD) to regulate JAK-STAT pathway (Gruber  
159 et al. 2016). We found that *Yap1* knockout restricted the expressions of STAT1, p-STAT1 (T727)  
160 and p-STAT3 (Y705) in liver tumors of *Yap1*<sup>LKO</sup> mice (Fig. 5B, and 5C). But, the expression level  
161 of STAT3 did not change in *Yap1*<sup>LKO</sup> mice and sh*YAP1*-HepG2215 cells (Fig. 5C). These results  
162 showed that YAP1 promotes p-STAT1 (T727) and p-STAT3 (Y705) activation, not STAT3  
163 expression. JAK1, but not JAK2, is the primary mediator of JAK-STAT pathway in melanoma or  
164 bladder tumor (Luo et al. 2018, Daza-Cajigal et al. 2019). Interestingly, JAK1, the upstream  
165 molecule of JAK-STAT pathway was also reduced in *Yap1*<sup>LKO</sup> mice (Fig. 5B and 5C). These  
166 results showed that YAP1 promotes JAK1 expression.

167 p-STAT3 (Y705) upregulated the expression level of PD-L1 (Bu et al. 2017). Further, the  
168 expression of PD-L1 decreased after treated with p-STAT3 (Y705) inhibitor, NSC74859 (Fig. 5D).



169 YAP1 knockout inhibited the expression of p-STAT3 (Y705) in liver tumors of *Yap1*<sup>LKO</sup> mice (Fig.  
170 5C). These results showed that YAP1 interacted with p-STAT3 (Y705) to promoted PD-L1  
171 expression. Taken together, we suggested that JAK1/STAT1, 3 facilitate PD-L1 expression  
172 depending on YAP1 (Fig. 5E).

173 Besides PD-L1 on the tumor cells, PD-1<sup>+</sup>CD8<sup>+</sup> T cells were correlated with exhausted  
174 signature in HCC (Ma, Zheng, et al. 2019). YAP1 inhibitor, verteporfin, decreased the percentage  
175 of PD-1<sup>+</sup>CD8<sup>+</sup> T cells, while increased the percentage of PD-1<sup>-</sup>CD8<sup>+</sup> T cells in spleen in  
176 DEN/TCPOBOP-induced liver tumor mice (Fig. 5F). The result suggested that YAP1 increased  
177 the number of exhausted CD8<sup>+</sup>T cells in spleen. Further, we detected that the number of CD4<sup>+</sup> T  
178 and CD8<sup>+</sup> T cells were elevated in liver tumor of *Yap1*<sup>LKO</sup> mice (Fig. 5B and 5G). The result  
179 suggested that YAP1 reduced the number of T cells in liver tumor niche. TGF- $\beta$  inhibited CD8<sup>+</sup>T  
180 cell activation and promoted Treg differentiation (Ringelhan et al. 2018). Verteporfin decreased  
181 the expression level of TGF- $\beta$  in liver tumor of C57BL/6 mice (Fig. 5H). These results showed  
182 that YAP1 knockout alleviated suppressive tumor microenvironment *in vivo*.

### 183 **DHA broke the tumor immunosuppressive microenvironment.**

184 Further, anti-PD-1 treatment increased the percentage of PD-1<sup>+</sup>CD4<sup>+</sup> and PD-1<sup>+</sup>CD8<sup>+</sup> T cells,  
185 decreased PD-1<sup>-</sup>CD8<sup>+</sup> T cells in PBMC of C57BL/6 mice with DEN/TCPOBOP-induced liver  
186 tumor (Fig. 6A). And anti-PD-1 increased the percentage of PD-1<sup>+</sup> CD4<sup>+</sup> T cells, decreased  
187 PD-1<sup>-</sup>CD4<sup>+</sup> and PD-1<sup>-</sup>CD8<sup>+</sup> T cells in spleen (Fig. 6B). These results suggested that anti-PD-1  
188 treatment increased the number of exhausted T cells and decreased the functional T cells in  
189 peripheral blood and spleen. Furthermore, anti-PD-1 treatment decreased IFN- $\gamma$  in liver tumor

190 tissues (Fig. 6D).

191 Interestingly, DHA decreased the percentage of PD-1<sup>+</sup>CD4<sup>+</sup> T cells and PD-1<sup>+</sup> CD8<sup>+</sup> T cells,  
192 while increased the percentage of PD-1<sup>-</sup>CD4<sup>+</sup> T cells in spleen (Fig. 6B). And DHA decreased  
193 PD-L1 in liver tumor tissues and increased IFN- $\gamma$  in serum and liver tumor tissues (Fig. 6D).  
194 Furthermore, DHA increased CD8<sup>+</sup> T cells in liver tumor tissues (Fig. 6C), similarly to the result  
195 of *Yap1*<sup>LKO</sup> (Fig. 5G) or verteporfin-treated mice (Fig. 6C). These results suggested that DHA  
196 inhibited YAP1, leading to improvement of the anti-tumor immune microenvironment in mice.

197 Notably, DHA combined with anti-PD-1 decreased the percentage of PD-1<sup>+</sup> CD4<sup>+</sup> T cells and  
198 increased the percentage of PD-1<sup>-</sup>CD4<sup>+</sup> T cells compared with anti-PD-1 treatment (Fig. 6B).  
199 However, the combination treatment was not significantly changed the percentage PD-1<sup>+</sup>CD8<sup>+</sup> and  
200 PD-1<sup>-</sup>CD8<sup>+</sup> T cells compared with anti-PD-1 treatment (Fig. 6B). Furthermore, the number of  
201 CD8<sup>+</sup> T cells of tumor tissues were increased in DHA combined with anti-PD-1 treatment  
202 compare with DHA, anti-PD-1 or verteporfin alone (Fig. 6C). Together, these data demonstrated  
203 that DHA combined with anti-PD-1 treatment promoted CD4<sup>+</sup> T cell activation in the spleen and  
204 increased the number of CD8<sup>+</sup> T cells in tumor tissues.

## 205 Discussion

206 Single-agent anti-PD-1 therapy was far from enough to improve the survival rate of HCC  
207 patients. Here, we present evidenced that YAP1 in tumor tissues directly promotes PD-L1 and  
208 reduced CD4<sup>+</sup> and CD8<sup>+</sup> T cells in the local tumor tissues. Indirectly, JAK1/STAT1, 3 promoted  
209 PD-L1 expression depending YAP1. Notably, we suggested that DHA, a drug approved by FDA,  
210 acted as a YAP1 inhibitor, broke the immunosuppressive microenvironment, leading to increase

211 the efficacy of anti-PD-1 therapy in mice.

212 JAK-STAT pathway also causes ICI resistance in some melanoma patients (Nguyen et al.  
213 2021). p-STAT3 (Y705) was detected in approximately 60% of HCC samples (He et al. 2010).  
214 STAT3 directly binds to the PD-L1 promoter to increase its expression (Marzec et al. 2008).  
215 Interestingly, we showed that p-STAT3 (Y705) was reduced in HepG2215 cells and liver tumor  
216 cells of *Yap1<sup>LKO</sup>* mice. YAP1 still binds to STAT3 promoter in nucleus and promotes STAT3  
217 expression at the transcriptional level in pancreatic ductal adenocarcinoma cells (Gruber et al.  
218 2016). STAT1 is also highly expressed in HCC tissues (Ma, Chen, et al. 2019). Individual STAT1  
219 and STAT3 activation induces PD-L1 expression in HCC cells (Garcia-Diaz et al. 2017). In  
220 addition, p-STAT1 (T727) and p-STAT3 (Y705) dimerized and bound to PD-L1 promoter, leading  
221 to PD-L1 expression in human breast cancer cells (Sasidharan Nair et al. 2018). Our results  
222 suggest that p-STAT1 (T727) and p-STAT3 (Y705) promoted PD-L1 expression by YAP1 in liver  
223 tumor cells, separately. Furthermore, JAK1, but not JAK2, is the primary mediator of JAK/STAT  
224 pathway associated with PD-L1-mediated immune surveillance in melanoma (Luo et al. 2018) and  
225 bladder cancer (Daza-Cajigal et al. 2019). Accordingly, IL-6-activated JAK1 phosphorylates  
226 PD-L1 and induces PD-L1 glycosylation, which maintain PD-L1 stability in liver tumor cells  
227 (Chan et al. 2019). STAT3 activation in hepatocytes is not required for the tumor formation  
228 after knockout of 2 mammalian Hippo kinases (*Mst1* and *Mst2*), which inhibit YAP1 activation in  
229 mice (Kim et al. 2017). Moreover, our results suggested that YAP1 knockout restrains JAK1  
230 expression in *Yap1<sup>LKO</sup>* mice. HCC is a cancer with high percentage (~7%) of JAK1 mutations  
231 (Kan et al. 2013). Especially, simply knockdown YAP1 can induce PD-L1 expression in HCC.

232 YAP1 directly bound to PD-L1 promoter (Kim et al. 2018). YAP1 knockdown decreased  
233 PD-L1 expression in HepG2215 cells. Consistently, our previous research also found that  
234 verteporfin inhibited PD-L1 expression in liver tumor cells (Li et al. 2020). However, anti-PD-1  
235 treatment increased YAP1 and decreased PD-L1 in liver tumor in mice, suggesting others besides  
236 YAP1 can be involved in PD-L1 expression. IFN- $\gamma$  was an important cause of inducing PD-L1  
237 expression in tumor microenvironment (Qian et al. 2018, Thiem et al. 2019). Here we showed that  
238 anti-PD-1 treatment decreased PD-L1 and IFN- $\gamma$  expression in liver tumor tissues of mice. In  
239 addition, interactions between increased YAP1 and TGF- $\beta$  in hepatocytes stimulate  
240 epithelial-to-mesenchymal transition (EMT)-like response in a TGF- $\beta$ -enriched microenvironment  
241 after partial hepatectomy (Oh et al. 2018). Further, verteporfin suppressed the TGF- $\beta$  expression  
242 in the liver tumor tissue of mice. Therefore, elevated YAP1 is involved in HCC tumor  
243 microenvironment during anti-PD-1 treatment.

244 Notably, selectively knockout *Yap1* from hepatocytes increased CD4<sup>+</sup> and CD8<sup>+</sup> T cell  
245 infiltration in liver tumor niche of *Yap1*<sup>LKO</sup> mice. Verteporfin, a YAP1 inhibitor to disrupt the  
246 interaction between YAP/TAZ and TEAD complex, increased the percentage of CD8<sup>+</sup> T cells in  
247 liver tumor niche in mice. Consistently, verteporfin treatment increased T cell activation without  
248 significant effect on T cell proliferation (Stampouloglou et al. 2020). Collectively, disruption of  
249 YAP1 in liver tumor cells recruits CD8<sup>+</sup> T cells to tumor niche. Meanwhile, YAP1 in T cells is  
250 elevated upon T-cell activation, and deletion of YAP1 in T cells promotes T-cell infiltration into  
251 the local tumor niche (Stampouloglou et al. 2020). Therefore, we considered that YAP1 inhibitor  
252 reduced PD-L1 expression on tumor and increase T cell recruitment.

253 DHA was a derivative of artemisinin extracted from *artemisia annua* Linn (Guo 2016). Our  
254 previous studies showed that DHA inhibited HepG2(Hao et al. 2021) and HepG2215 cells (Shi et  
255 al. 2019). Meanwhile, some studies suggested that DHA downregulated PD-L1 expression in  
256 non-small cell lung cancer (Zhang et al. 2020). Interestingly, DHA decreased YAP1 in tumor  
257 tissues but increased YAP1 in para-tumor, leading to the increased ratio of YAP1, suggesting the  
258 competitive advantage of para-tumor tissues, which appears to eliminate liver tumor cells in mice  
259 (Moya et al. 2019). The result is similar to YAP1 inhibitor, verteporfin. Further, we showed that  
260 the ratio of YAP1 expression was significantly negatively correlated with YAP1 in tumor tissues  
261 from HCC patients. Similarly, PD-L1 and CD8 were decreased in tumor tissues compared to  
262 adjacent normal liver tissues from 143 HCC patients (Guo et al. 2020). We further showed that  
263 combination anti-PD-1 with DHA increased in para-tumor and decreased YAP1 in tumor tissues.  
264 However, anti-PD-1 treatment increased YAP1 expression in para-tumor and tumor tissues, and  
265 the ratio of YAP1. Confusingly, anti-PD-1 treatment increased the number of exhausted T cells  
266 and decreased the functional T cells in blood and spleen of HCC mice. It was generally accepted  
267 that successful anti-tumor immune responses following anti-PD-1 therapy required tumor-specific  
268 CTLs in the tumor niche (Wu et al. 2019). Interestingly, DHA increased the number of CD8<sup>+</sup> T  
269 cells in tumor tissues, about 3-fold change that of anti-PD-1 treatment. This effect is similar to that  
270 of verteporfin treatment and *Yap1*<sup>LKO</sup> mice. In addition, DHA decreased the number of exhausted  
271 T cells (PD-1<sup>+</sup>CD4<sup>+</sup> or PD-1<sup>+</sup>CD8<sup>+</sup> T cells), increased the functional PD-1<sup>-</sup>CD4<sup>+</sup> cells in spleen.  
272 Consistently, DHA induced IFN- $\gamma$ <sup>+</sup>CD8<sup>+</sup> T cell proliferation, and reduced the number of  
273 CD4<sup>+</sup>CD25<sup>+</sup>Foxp3<sup>+</sup> T cells in melanoma tumor tissue compared with normal tissue (Yu et al.

274 2020). Moreover, the advantages of combination therapy over treatment alone were reduced YAP1  
275 in tumor tissue and increased the ratio of YAP1 in adjacent tissues to inhibit the tumor volume.  
276 Notably, the combination of DHA and anti-PD-1 was increased CD8<sup>+</sup> T cell number in tumor  
277 tissues. Therefore, DHA was used as a potent YAP1 inhibitor and combined with anti-PD-1 to  
278 suppression of immune evasion in liver tumors.

279 In summary, we confirmed firstly that YAP1 knockdown in liver tumor cells suppressed  
280 PD-L1 expression and recruit CTLs, leading to break immune evasion in tumor niche.  
281 Mechanistically, JAK1/STAT1, 3 promoted PD-L1 expression by YAP1 in HCC. Finally, DHA, as  
282 a potent YAP1 inhibitor, broke the immunosuppressive niche in liver tumor tissues to improve the  
283 effect of anti-PD-1 therapy.

## 284 **Materials and Methods**

### 285 **Bioinformatics analysis**

286 Raw counts of RNA-sequencing data, corresponding clinical information from 371 HCC and  
287 normal tissue samples were obtained from The Cancer Genome Atlas (TCGA)  
288 ([portal.gdc.cancer.gov/](http://portal.gdc.cancer.gov/)) (Weinstein et al. 2013). The mRNA expression level of *YAP1* was  
289 analyzed compared with normal samples. And the expression of *YAP1* in different tumor stages of  
290 HCC was analyzed.

### 291 **Cell culture**

292 HepG2215 cells were purchased from American Type Culture Collection (Manassas, VA, USA).  
293 sh*YAP1*-HepG2215 cells has been constructed previously (Li et al. 2020). They were cultured in  
294 DMEM (Gibco/Thermo Fisher Scientific, Beijing, China) supplemented with 10% fetal bovine

295 serum (Gibco/Thermo Fisher Scientific, Beijing, China), 100 U/ml penicillin and 100 ug/ml  
296 streptomycin at 37 °C and 5% CO<sub>2</sub>, in an atmosphere of 100% humidity.

### 297 **Cell treatment**

298 NSC-74859 (MCE, China) was dissolved in DMSO (Sigma-Aldrich, USA) and stored at -20°C.  
299 HepG2215 cells were treated with NSC-74859 (100µM) for 24 h. The culture medium containing  
300 DMSO was used as the control.

### 301 **Animal experiments**

302 The protocol was approved by the Ethics Committee for Animal Experiment of Hebei University  
303 of Chinese Medicine (Shijiazhuang, China) (Permit number: YXLL2018002). All animal were  
304 maintained in the SPF facility with constant temperature (22-24 °C) and a dark-light cycle of  
305 12h/12h. All experiments were conducted with male mice. C57BL/6 mice (Vital River Laboratory  
306 Animal Technology Co. Ltd., Beijing, China) at the age of 3 weeks were used. The genetically  
307 engineered albumin-cre mice were purchased from Guangzhou Cyagen Biosciences (Guangzhou,  
308 China). *Yap1*<sup>flox/flox</sup> mice with a *loxP*-flanked *Yap1* allele on a C57BL/6N background were  
309 generated. Albumin-cre mice were crossed with *Yap1*<sup>flox/flox</sup> mice to produce *Yap1*<sup>flox/flox, Alb-cre</sup>  
310 (mark as *Yap1*<sup>LKO</sup>) mice, the liver-specific knockout *Yap1* mice. DNA was extracted from mice tail,  
311 and amplified PCR in a thermocycler machine for genotype identification. The primer sequences  
312 are shown in supplementary Table 1.

### 313 **DEN/TCPOBOP-induced liver tumor model in C57BL/6 mice**

314 Each 3-week-old male C57BL/6 mice, including wild type, *Yap1*<sup>flox/flox</sup> and *Yap1*<sup>LKO</sup> mice, was  
315 injected intraperitoneally with N-nitrosodiethylamine (DEN) at the dose of 25 mg/kg body weight.

316 At the age of 4 weeks, the mice received ten consecutive biweekly injections with TCPOBOP  
317 (3 mg/kg). The method was introduced as previously described (Li et al. 2020, Bergmann et al.  
318 2017). At the 24th week of age, the tumors in liver were determined by ultrasound in the mice by  
319 an imaging system (Vevo 2100, VisualSonics Inc., Toronto, Canada) with an MS250 ultrasound  
320 transducer (Li et al. 2020). After successful modeling, they were randomly divided into five  
321 groups (n=6) and treated for 25 d. During the treatment, no mice died from tumor loading. The  
322 mice of anti-PD-1 group were injected intraperitoneally with anti-PD-1 (BioXcell, USA, 10 mg/kg)  
323 every 3 d. DHA group were intraperitoneally injected daily with DHA in DMSO (25mg/kg) (Shi et  
324 al. 2017). The mice in anti-PD-1 combined with DHA group were intraperitoneally injected with  
325 DHA (25mg/kg) and anti-PD-1 (10 mg/kg) once every 3 d. Verteporfin group were  
326 intraperitoneally injected daily with verteporfin in DMSO (100 mg/kg) for 25 days. The mice in  
327 the control group were intraperitoneally injected daily with 0.1% DMSO in 100 $\mu$ l physiological  
328 saline.

### 329 **Quantitative reverse transcription-polymerase chain reaction (qRT-PCR)**

330 Total RNA was extracted from *shYAP1*-HepG2215 cells using TRIzol reagent (ThermoFisher  
331 Scientific, America) according to the manufacturer's instructions. Then, RNA was converted into  
332 cDNA with Prime Script RT reagent kit (Takara Bio Inc, Japan). Real time fluorescence qRT-PCR  
333 was performed on a Real-Time PCR system (BIOER Co. Ltd., Kokyo, Japan). Finally, the Ct  
334 values were obtained from the ABI 7500 fast v2.0.1 software. The  $\Delta\Delta$ Ct method was used to  
335 represent mRNA fold change. The primer sequences are shown in supplementary Table 1.

### 336 **Western blot**



337 Total protein was harvested from HCC cells using column tissue and cell protein extraction kit  
338 (Shanghai Yamei Biotechnology Co., Ltd, Shanghai, China). Proteins were separated on 12% SDS  
339 -PAGE and transferred to PVDF membranes. After blocking, PVDF membranes were incubated  
340 with primary antibodies, and then secondary antibodies. The primary antibodies were rabbit  
341 anti-YAP1 antibody (CST, #14074), rabbit anti-TAZ antibody (CST, #72804), rabbit anti-JAK1  
342 antibody (Abways, CY7173), mouse anti-STAT3 antibody (CST, #9139), mouse  
343 anti-p-STAT3(Y705) antibody (CST, #4113), rabbit anti-STAT1 antibody (CST, #14994), mouse  
344 anti-PD-L1 antibody (abcam, ab238697), rabbit anti-GAPDH antibody (Abways, ab0037), rabbit  
345 ACTIN antibody (Abways, ab0035), and rabbit anti-Tubulin antibody (Abways, ab0039). The  
346 secondary antibodies were goat anti-rabbit IgG-HRP (ZSGB-BIO, ZB-2301) and goat anti-mouse  
347 IgG-HRP (Abways, ab0102). The bands were visualized by enhanced chemiluminescence (ECL)  
348 kit (Shanghai Share-bio Technology Co., Ltd, China) and detected by Fusion FX5 Spectra ECL  
349 detection systems (Vilber, France). The band intensity was measured by the Image-Pro Plus v6.0  
350 software (Media Cybernetics. USA).

### 351 **Immunohistochemistry (IHC)**

352 Human HCC tissue microarray was purchased from Servicebio (China, Wuhan, no:  
353 IWLTL-N-64LV41 Live C-1401). The liver tissue from the mice was fixed with 4%  
354 paraformaldehyde and embedded in paraffin. Then, the liver tissue sections (2  $\mu$ m in thickness)  
355 were deparaffinised, and dehydrated before staining with haematoxylin and eosin (H&E). After  
356 deparaffinized and rehydrated, tissue sections were retrieved antigen, inactivated the endogenous  
357 enzyme, and incubated with primary antibodies (rabbit anti-p-STAT1 (T727) (abcam, ab109461),

358 rabbit anti-Ki67 (CST, 12202S) and other antibodies have been described in the Western blot  
359 section). PBS was used as the negative control for the primary antibody. And then, the sections  
360 were rinsed and incubated with the secondary antibody. Subsequently, the sections were  
361 developed with 3, 3-diaminobenzidine (DAB) kit (ZSGB-Bio, China). Finally, the  
362 cytomembrane/cytoplasm stained with light yellow or tan were regarded as positive cells.

363 IHC staining was scored according to the following method. The percentage of positive cells in  
364 total cells of  $\leq 5\%$  was Negative expression (-) and scored as 0 point. 6-25% was weak expression  
365 (+) and 1 point. 26-50% was moderate expression (++) and 2 points.  $> 50\%$  was strong  
366 expression (+++) and 3 points. The judgment of protein expression is based on both the staining  
367 intensity and positive cell rate, and the product of these two values was calculated. After the  
368 multiplication of the two scores, they were divided into two groups: the group with the product of  
369 not less than 3 points was defined as the high expression group, and the group with the product of  
370 less than 3 points was defined as the low expression group.

#### 371 **Immunofluorescence assay (IF)**

372 After deparaffinized and rehydrated, tissue sections from mice were retrieved antigen, inactivated  
373 the endogenous enzyme, incubated with primary antibody, and then second antibody. The primary  
374 antibodies were rabbit anti-CD4 (Seville Biological, GB11064,) and rabbit anti-CD8 (Seville  
375 Biological, GB13429). The secondary antibody was FITC goat anti-rabbit IgG-HRP (Seville  
376 Biological, GB22303,). Finally, the tissue sections were washed and incubated in DAPI. All  
377 fluorescence images were observed under a Biosystem microscopy (Leica, Wetzlar, Germany).

#### 378 **Flow cytometry**

379 The mouse blood and single cells from spleen were used to separate Peripheral blood  
380 mononuclear cells (PBMC) with Mouse peripheral blood lymphocyte isolation solution kit (P8620,  
381 Solarbio, Beijing, China). The following fluorochrome-labeled mono-antibodies and staining  
382 reagents were used according to the protocols. Cells from PBMC or spleen were stained with  
383 anti-mouse CD3 $\epsilon$ , FITC (MultiSciences, AM003E01), anti-mouse CD279 (PD-1), APC  
384 (Biolegend, 135210), anti-mouse CD8a, PE (MultiSciences, AM008A04), and anti-mouse CD4,  
385 PE (MultiSciences, AM00404). The cells were analyzed with by an FC 500 MCL flow cytometer  
386 (Beckman Coulter, Inc. USA) and analyzed CXP software (version 2.1; Beckman Coulter, Inc.).

#### 387 **Enzyme linked immunosorbent assay (ELISA)**

388 Tissue homogenates of liver tumor or serum were added to 96-well plates from these kits,  
389 including Mouse PD-L1 ELISA Kit (mlbio, ml058347), Mouse TGF- $\beta$  ELISA Kit (mlbio,  
390 ml057830), Mouse Alanine Aminotransferase (ALT) ELISA Kit (mlbio, ml063179), Mouse IFN- $\gamma$   
391 ELISA Kit (mlbio, ml002277). The main steps are carried out according to the instructions.  
392 Finally, the Stop Solution changes the color from blue to yellow, and the intensity of the color is  
393 measured at 450 nm using a spectrophotometer (Rayto, Shenzhen, RT-6100). The concentration of  
394 the target protein in the samples is then determined by comparing the O.D. of the samples to the  
395 standard curve.

#### 396 **Statistical analysis**

397 Statistical analyses were performed by SPSS 23.0 statistics software (SPSS, Chicago, IL) and  
398 GraphPad Prism 8 software. All *in vitro* and *in vivo* experiments were repeated at least three times  
399 and at least three samples were taken at a time. If data were normally distributed, they are

400 represented as means  $\pm$  SD. When more than two groups were included, one-way analysis of  
401 variance would be used. Differences were considered statistically significant when *P*-value was  
402 less than 0.05.

### 403 **Acknowledgements**

404 This work was financially supported by the National Natural Science Foundation of China  
405 (81873112).

### 406 **Author contributions**

407 Xinli Shi designed research. Qing Peng, Shenghao Li, Yinglin Guo, Liyuan Hao, Zhiqin Zhang,  
408 Jingmin Ji, Yanmeng Zhao, Caige Li, Yu Xue and Yiwei Liu performed research. Qing Peng,  
409 Shenghao Li, Yinglin Guo, and Liyuan Hao analyzed data. Xinli Shi, Qing Peng and Shenghao Li  
410 wrote the paper.

### 411 **Declaration of Competing Interest**

412 The authors have declared no conflict of interest.

413

414

415

416

417

418

419

420

421

422 **Reference**

- 423 Bergmann, J., M. Müller, N. Baumann, M. Reichert, C. Heneweer, J. Bolik, K. Lücke, S. Gruber,  
424 A. Carambia, S. Boretius, I. Leuschner, T. Becker, B. Rabe, J. Herkel, F. T.  
425 Wunderlich, H. W. Mittrücker, S. Rose-John, and D. Schmidt-Arras. 2017. "IL-6  
426 trans-signaling is essential for the development of hepatocellular carcinoma in mice."  
427 *Hepatology* 65 (1):89-103. doi: 10.1002/hep.28874.
- 428 Bu, L. L., G. T. Yu, L. Wu, L. Mao, W. W. Deng, J. F. Liu, A. B. Kulkarni, W. F. Zhang, L. Zhang,  
429 and Z. J. Sun. 2017. "STAT3 Induces Immunosuppression by Upregulating  
430 PD-1/PD-L1 in HNSCC." *J Dent Res* 96 (9):1027-1034. doi:  
431 10.1177/0022034517712435.
- 432 Calderaro, J., B. Rousseau, G. Amaddeo, M. Mercey, C. Charpy, C. Costentin, A. Luciani, E. S.  
433 Zafrani, A. Laurent, D. Azoulay, F. Lafdil, and J. M. Pawlotsky. 2016. "Programmed  
434 death ligand 1 expression in hepatocellular carcinoma: Relationship With clinical and  
435 pathological features." *Hepatology* 64 (6):2038-2046. doi: 10.1002/hep.28710.
- 436 Chan, L. C., C. W. Li, W. Xia, J. M. Hsu, H. H. Lee, J. H. Cha, H. L. Wang, W. H. Yang, E. Y.  
437 Yen, W. C. Chang, Z. Zha, S. O. Lim, Y. J. Lai, C. Liu, J. Liu, Q. Dong, Y. Yang, L. Sun,  
438 Y. Wei, L. Nie, J. L. Hsu, H. Li, Q. Ye, M. M. Hassan, H. M. Amin, A. O. Kaseb, X. Lin,  
439 S. C. Wang, and M. C. Hung. 2019. "IL-6/JAK1 pathway drives PD-L1 Y112  
440 phosphorylation to promote cancer immune evasion." *J Clin Invest* 129  
441 (8):3324-3338. doi: 10.1172/jci126022.

- 442 Cho, Y., M. J. Park, K. Kim, S. W. Kim, W. Kim, S. Oh, and J. H. Lee. 2020. "Reactive oxygen  
443 species-induced activation of Yes-associated protein-1 through the c-Myc pathway is  
444 a therapeutic target in hepatocellular carcinoma." *World J Gastroenterol* 26  
445 (42):6599-6613. doi: 10.3748/wjg.v26.i42.6599.
- 446 Daza-Cajigal, V., A. S. Albuquerque, J. Pearson, J. Hinley, A. S. Mason, J. Stahlschmidt, A. J.  
447 Thrasher, V. Mishra, J. Southgate, and S. O. Burns. 2019. "Loss of Janus Associated  
448 Kinase 1 Alters Urothelial Cell Function and Facilitates the Development of Bladder  
449 Cancer." *Front Immunol* 10:2065. doi: 10.3389/fimmu.2019.02065.
- 450 Fan, Y., Y. Gao, J. Rao, K. Wang, F. Zhang, and C. Zhang. 2017. "YAP-1 Promotes Tregs  
451 Differentiation in Hepatocellular Carcinoma by Enhancing TGFBR2 Transcription."  
452 *Cell Physiol Biochem* 41 (3):1189-1198. doi: 10.1159/000464380.
- 453 Garcia-Diaz, A., D. S. Shin, B. H. Moreno, J. Saco, H. Escuin-Ordinas, G. A. Rodriguez, J. M.  
454 Zaretsky, L. Sun, W. Hugo, X. Wang, G. Parisi, C. P. Saus, D. Y. Torrejon, T. G.  
455 Graeber, B. Comin-Anduix, S. Hu-Lieskovan, R. Damoiseaux, R. S. Lo, and A. Ribas.  
456 2017. "Interferon Receptor Signaling Pathways Regulating PD-L1 and PD-L2  
457 Expression." *Cell Rep* 19 (6):1189-1201. doi: 10.1016/j.celrep.2017.04.031.
- 458 Gruber, R., R. Panayiotou, E. Nye, B. Spencer-Dene, G. Stamp, and A. Behrens. 2016. "YAP1  
459 and TAZ Control Pancreatic Cancer Initiation in Mice by Direct Up-regulation of  
460 JAK-STAT3 Signaling." *Gastroenterology* 151 (3):526-39. doi:  
461 10.1053/j.gastro.2016.05.006.
- 462 Guo, M., F. Yuan, F. Qi, J. Sun, Q. Rao, Z. Zhao, P. Huang, T. Fang, B. Yang, and J. Xia. 2020.

463 "Expression and clinical significance of LAG-3, FGL1, PD-L1 and CD8(+)T cells in  
464 hepatocellular carcinoma using multiplex quantitative analysis." *J Transl Med* 18  
465 (1):306. doi: 10.1186/s12967-020-02469-8.

466 Guo, X., Y. Zhao, H. Yan, Y. Yang, S. Shen, X. Dai, X. Ji, F. Ji, X. G. Gong, L. Li, X. Bai, X. H.  
467 Feng, T. Liang, J. Ji, L. Chen, H. Wang, and B. Zhao. 2017. "Single tumor-initiating  
468 cells evade immune clearance by recruiting type II macrophages." *Genes Dev* 31  
469 (3):247-259. doi: 10.1101/gad.294348.116.

470 Guo, Z. 2016. "Artemisinin anti-malarial drugs in China." *Acta Pharm Sin B* 6 (2):115-24. doi:  
471 10.1016/j.apsb.2016.01.008.

472 Hao, L., S. Li, Q. Peng, Y. Guo, J. Ji, Z. Zhang, Y. Xue, Y. Liu, and X. Shi. 2021. "Anti-malarial  
473 drug dihydroartemisinin downregulates the expression levels of CDK1 and CCNB1 in  
474 liver cancer." *Oncol Lett* 22 (3):653. doi: 10.3892/ol.2021.12914.

475 He, G., G. Y. Yu, V. Temkin, H. Ogata, C. Kuntzen, T. Sakurai, W. Sieghart, M.  
476 Peck-Radosavljevic, H. L. Leffert, and M. Karin. 2010. "Hepatocyte  
477 IKKbeta/NF-kappaB inhibits tumor promotion and progression by preventing oxidative  
478 stress-driven STAT3 activation." *Cancer Cell* 17 (3):286-97. doi:  
479 10.1016/j.ccr.2009.12.048.

480 Huang, C. Y., Y. Wang, G. Y. Luo, F. Han, Y. Q. Li, Z. G. Zhou, and G. L. Xu. 2017.  
481 "Relationship Between PD-L1 Expression and CD8+ T-cell Immune Responses in  
482 Hepatocellular Carcinoma." *J Immunother* 40 (9):323-333. doi:  
483 10.1097/cji.000000000000187.

- 484 Kan, Z., H. Zheng, X. Liu, S. Li, T. D. Barber, Z. Gong, H. Gao, K. Hao, M. D. Willard, J. Xu, R.  
485 Hauptschein, P. A. Rejto, J. Fernandez, G. Wang, Q. Zhang, B. Wang, R. Chen, J.  
486 Wang, N. P. Lee, W. Zhou, Z. Lin, Z. Peng, K. Yi, S. Chen, L. Li, X. Fan, J. Yang, R.  
487 Ye, J. Ju, K. Wang, H. Estrella, S. Deng, P. Wei, M. Qiu, I. H. Wulur, J. Liu, M. E.  
488 Ehsani, C. Zhang, A. Loboda, W. K. Sung, A. Aggarwal, R. T. Poon, S. T. Fan, J.  
489 Hardwick, C. Reinhard, H. Dai, Y. Li, J. M. Luk, and M. Mao. 2013. "Whole-genome  
490 sequencing identifies recurrent mutations in hepatocellular carcinoma." *Genome*  
491 *Res* 23 (9):1422-33. doi: 10.1101/gr.154492.113.
- 492 Kim, M. H., C. G. Kim, S. K. Kim, S. J. Shin, E. A. Choe, S. H. Park, E. C. Shin, and J. Kim.  
493 2018. "YAP-Induced PD-L1 Expression Drives Immune Evasion in BRAFi-Resistant  
494 Melanoma." *Cancer Immunol Res* 6 (3):255-266. doi:  
495 10.1158/2326-6066.Cir-17-0320.
- 496 Kim, W., S. K. Khan, J. Gvozdenovic-Jeremic, Y. Kim, J. Dahlman, H. Kim, O. Park, T. Ishitani,  
497 E. H. Jho, B. Gao, and Y. Yang. 2017. "Hippo signaling interactions with  
498 Wnt/ $\beta$ -catenin and Notch signaling repress liver tumorigenesis." *J Clin Invest* 127  
499 (1):137-152. doi: 10.1172/jci88486.
- 500 Lee, B. S., D. I. Park, D. H. Lee, J. E. Lee, M. K. Yeo, Y. H. Park, D. S. Lim, W. Choi, G. Yoo, H.  
501 B. Kim, D. Kang, J. Y. Moon, S. S. Jung, J. O. Kim, S. Y. Cho, H. S. Park, and C.  
502 Chung. 2017. "Hippo effector YAP directly regulates the expression of PD-L1  
503 transcripts in EGFR-TKI-resistant lung adenocarcinoma." *Biochem Biophys Res*  
504 *Commun* 491 (2):493-499. doi: 10.1016/j.bbrc.2017.07.007.



- 505 Lei, A., L. Chen, M. Zhang, X. Yang, L. Xu, N. Cao, Z. Zhang, and Y. Cao. 2019. "EZH2  
506 Regulates Protein Stability via Recruiting USP7 to Mediate Neuronal Gene  
507 Expression in Cancer Cells." *Front Genet* 10:422. doi: 10.3389/fgene.2019.00422.
- 508 Li, N., J. Wang, N. Zhang, M. Zhuang, Z. Zong, J. Zou, G. Li, X. Wang, H. Zhou, L. Zhang, and  
509 Y. Shi. 2018. "Cross-talk between TNF- $\alpha$  and IFN- $\gamma$  signaling in induction of B7-H1  
510 expression in hepatocellular carcinoma cells." *Cancer Immunol Immunother* 67  
511 (2):271-283. doi: 10.1007/s00262-017-2086-8.
- 512 Li, S., J. Ji, Z. Zhang, Q. Peng, L. Hao, Y. Guo, W. Zhou, Q. Cui, and X. Shi. 2020. "Cisplatin  
513 promotes the expression level of PD-L1 in the microenvironment of hepatocellular  
514 carcinoma through YAP1." *Mol Cell Biochem* 475 (1-2):79-91. doi:  
515 10.1007/s11010-020-03861-0.
- 516 Li, Y. X., J. H. Li, and D. W. Zhou. 2017. "Hippo signaling pathway in liver tissue homeostasis."  
517 *Yi Chuan* 39 (7):607-616. doi: 10.16288/j.ycz.17-064.
- 518 Li, Z., G. Tuteja, J. Schug, and K. H. Kaestner. 2012. "Foxa1 and Foxa2 are essential for  
519 sexual dimorphism in liver cancer." *Cell* 148 (1-2):72-83. doi:  
520 10.1016/j.cell.2011.11.026.
- 521 Luo, N., L. Formisano, P. I. Gonzalez-Ericsson, V. Sanchez, P. T. Dean, S. R. Opalenik, M. E.  
522 Sanders, R. S. Cook, C. L. Arteaga, D. B. Johnson, and J. M. Balko. 2018. "Melanoma  
523 response to anti-PD-L1 immunotherapy requires JAK1 signaling, but not JAK2."  
524 *Oncoimmunology* 7 (6):e1438106. doi: 10.1080/2162402x.2018.1438106.
- 525 Ma, B., K. Chen, P. Liu, M. Li, J. Liu, K. Sideras, D. Sprengers, K. Biermann, W. Wang, I.

- 526 Jzermans JNM, W. Cao, J. Kwekkeboom, M. P. Peppelenbosch, and Q. Pan. 2019.
- 527 "Dichotomal functions of phosphorylated and unphosphorylated STAT1 in
- 528 hepatocellular carcinoma." *J Mol Med (Berl)* 97 (1):77-88. doi:
- 529 10.1007/s00109-018-1717-7.
- 530 Ma, J., B. Zheng, S. Goswami, L. Meng, D. Zhang, C. Cao, T. Li, F. Zhu, L. Ma, Z. Zhang, S.
- 531 Zhang, M. Duan, Q. Chen, Q. Gao, and X. Zhang. 2019. "PD1(Hi) CD8(+) T cells
- 532 correlate with exhausted signature and poor clinical outcome in hepatocellular
- 533 carcinoma." *J Immunother Cancer* 7 (1):019-0814.
- 534 Marzec, M., Q. Zhang, A. Goradia, P. N. Raghunath, X. Liu, M. Paessler, H. Y. Wang, M.
- 535 Wysocka, M. Cheng, B. A. Ruggeri, and M. A. Wasik. 2008. "Oncogenic kinase
- 536 NPM/ALK induces through STAT3 expression of immunosuppressive protein CD274
- 537 (PD-L1, B7-H1)." *Proc Natl Acad Sci U S A* 105 (52):20852-7. doi:
- 538 10.1073/pnas.0810958105.
- 539 Moya, I. M., S. A. Castaldo, L. Van den Mooter, S. Soheily, L. Sansores-Garcia, J. Jacobs, I.
- 540 Mannaerts, J. Xie, E. Verboven, H. Hillen, A. Algueró-Nadal, R. Karaman, M. Van
- 541 Haele, W. Kowalczyk, M. De Waegeneer, S. Verhulst, P. Karras, L. van Huffel, L.
- 542 Zender, J. C. Marine, T. Roskams, R. Johnson, S. Aerts, L. A. van Grunsven, and G.
- 543 Halder. 2019. "Peritumoral activation of the Hippo pathway effectors YAP and TAZ
- 544 suppresses liver cancer in mice." *Science* 366 (6468):1029-1034. doi:
- 545 10.1126/science.aaw9886.
- 546 Nguyen, T. T., L. Ramsay, M. Ahanfeshar-Adams, M. Lajoie, D. Schadendorf, T. Alain, and I.

- 547 R. Watson. 2021. "Mutations in the IFN $\gamma$ -JAK-STAT Pathway Causing Resistance to  
548 Immune Checkpoint Inhibitors in Melanoma Increase Sensitivity to Oncolytic Virus  
549 Treatment." *Clin Cancer Res* 27 (12):3432-3442. doi:  
550 10.1158/1078-0432.ccr-20-3365.
- 551 Oh, S. H., M. Swiderska-Syn, M. L. Jewell, R. T. Premont, and A. M. Diehl. 2018. "Liver  
552 regeneration requires Yap1-TGF $\beta$ -dependent epithelial-mesenchymal transition in  
553 hepatocytes." *J Hepatol* 69 (2):359-367. doi: 10.1016/j.jhep.2018.05.008.
- 554 Qian, J., C. Wang, B. Wang, J. Yang, Y. Wang, F. Luo, J. Xu, C. Zhao, R. Liu, and Y. Chu.  
555 2018. "The IFN- $\gamma$ /PD-L1 axis between T cells and tumor microenvironment: hints for  
556 glioma anti-PD-1/PD-L1 therapy." *J Neuroinflammation* 15 (1):290. doi:  
557 10.1186/s12974-018-1330-2.
- 558 Ringelhan, M., D. Pfister, T. O'Connor, E. Pikarsky, and M. Heikenwalder. 2018. "The  
559 immunology of hepatocellular carcinoma." *Nat Immunol* 19 (3):222-232. doi:  
560 10.1038/s41590-018-0044-z.
- 561 Sasidharan Nair, V., S. M. Toor, B. R. Ali, and E. Elkord. 2018. "Dual inhibition of STAT1 and  
562 STAT3 activation downregulates expression of PD-L1 in human breast cancer cells."  
563 *Expert Opin Ther Targets* 22 (6):547-557. doi: 10.1080/14728222.2018.1471137.
- 564 Shi, X., L. Wang, X. Li, J. Bai, J. Li, S. Li, Z. Wang, and M. Zhou. 2017. "Dihydroartemisinin  
565 induces autophagy-dependent death in human tongue squamous cell carcinoma cells  
566 through DNA double-strand break-mediated oxidative stress." *Oncotarget* 8  
567 (28):45981-45993. doi: 10.18632/oncotarget.17520.

- 568 Shi, X., L. Wang, L. Ren, J. Li, S. Li, Q. Cui, and S. Li. 2019. "Dihydroartemisinin, an  
569 antimalarial drug, induces absent in melanoma 2 inflammasome activation and  
570 autophagy in human hepatocellular carcinoma HepG2215 cells." *Phytother Res* 33  
571 (5):1413-1425. doi: 10.1002/ptr.6332.
- 572 Stampoulouglou, E., N. Cheng, A. Federico, E. Slaby, S. Monti, G. L. Szeto, and X. Varelas.  
573 2020. "Yap suppresses T-cell function and infiltration in the tumor microenvironment."  
574 *PLoS Biol* 18 (1):e3000591. doi: 10.1371/journal.pbio.3000591.
- 575 Thiem, A., S. Hesbacher, H. Kneitz, T. di Primio, M. V. Heppt, H. M. Hermanns, M. Goebeler,  
576 S. Meierjohann, R. Houben, and D. Schrama. 2019. "IFN-gamma-induced PD-L1  
577 expression in melanoma depends on p53 expression." *J Exp Clin Cancer Res* 38  
578 (1):397. doi: 10.1186/s13046-019-1403-9.
- 579 Wang, G., X. Lu, P. Dey, P. Deng, C. C. Wu, S. Jiang, Z. Fang, K. Zhao, R. Konaparthi, S. Hua,  
580 J. Zhang, E. M. Li-Ning-Tapia, A. Kapoor, C. J. Wu, N. B. Patel, Z. Guo, V.  
581 Ramamoorthy, T. N. Tieu, T. Heffernan, D. Zhao, X. Shang, S. Khadka, P. Hou, B. Hu,  
582 E. J. Jin, W. Yao, X. Pan, Z. Ding, Y. Shi, L. Li, Q. Chang, P. Troncoso, C. J.  
583 Logothetis, M. J. McArthur, L. Chin, Y. A. Wang, and R. A. DePinho. 2016. "Targeting  
584 YAP-Dependent MDSC Infiltration Impairs Tumor Progression." *Cancer Discov* 6  
585 (1):80-95. doi: 10.1158/2159-8290.cd-15-0224.
- 586 Weinstein, J. N., E. A. Collisson, G. B. Mills, K. R. Shaw, B. A. Ozenberger, K. Ellrott, I.  
587 Shmulevich, C. Sander, and J. M. Stuart. 2013. "The Cancer Genome Atlas  
588 Pan-Cancer analysis project." *Nat Genet* 45 (10):1113-20. doi: 10.1038/ng.2764.

- 589 Wu, X., Z. Gu, Y. Chen, B. Chen, W. Chen, L. Weng, and X. Liu. 2019. "Application of PD-1  
590 Blockade in Cancer Immunotherapy." *Comput Struct Biotechnol J* 17:661-674. doi:  
591 10.1016/j.csbj.2019.03.006.
- 592 Xu-Monette, Z. Y., M. Zhang, J. Li, and K. H. Young. 2017. "PD-1/PD-L1 Blockade: Have We  
593 Found the Key to Unleash the Antitumor Immune Response?" *Front Immunol* 8:1597.  
594 doi: 10.3389/fimmu.2017.01597.
- 595 Yu, F. X., B. Zhao, and K. L. Guan. 2015. "Hippo Pathway in Organ Size Control, Tissue  
596 Homeostasis, and Cancer." *Cell* 163 (4):811-28. doi: 10.1016/j.cell.2015.10.044.
- 597 Yu, R., L. Jin, F. Li, M. Fujimoto, Q. Wei, Z. Lin, X. Ren, Q. Jin, H. Li, F. Meng, and G. Jin.  
598 2020. "Dihydroartemisinin inhibits melanoma by regulating CTL/Treg anti-tumor  
599 immunity and STAT3-mediated apoptosis via IL-10 dependent manner." *J Dermatol*  
600 *Sci* 99 (3):193-202. doi: 10.1016/j.jdermsci.2020.08.001.
- 601 Zhang, H., F. Zhou, Y. Wang, H. Xie, S. Luo, L. Meng, B. Su, Y. Ye, K. Wu, Y. Xu, and X.  
602 Gong. 2020. "Eliminating Radiation Resistance of Non-Small Cell Lung Cancer by  
603 Dihydroartemisinin Through Abrogating Immunity Escaping and Promoting Radiation  
604 Sensitivity by Inhibiting PD-L1 Expression." *Front Oncol* 10:595466. doi:  
605 10.3389/fonc.2020.595466.  
606  
607  
608  
609  
610

611 **Figure legends**

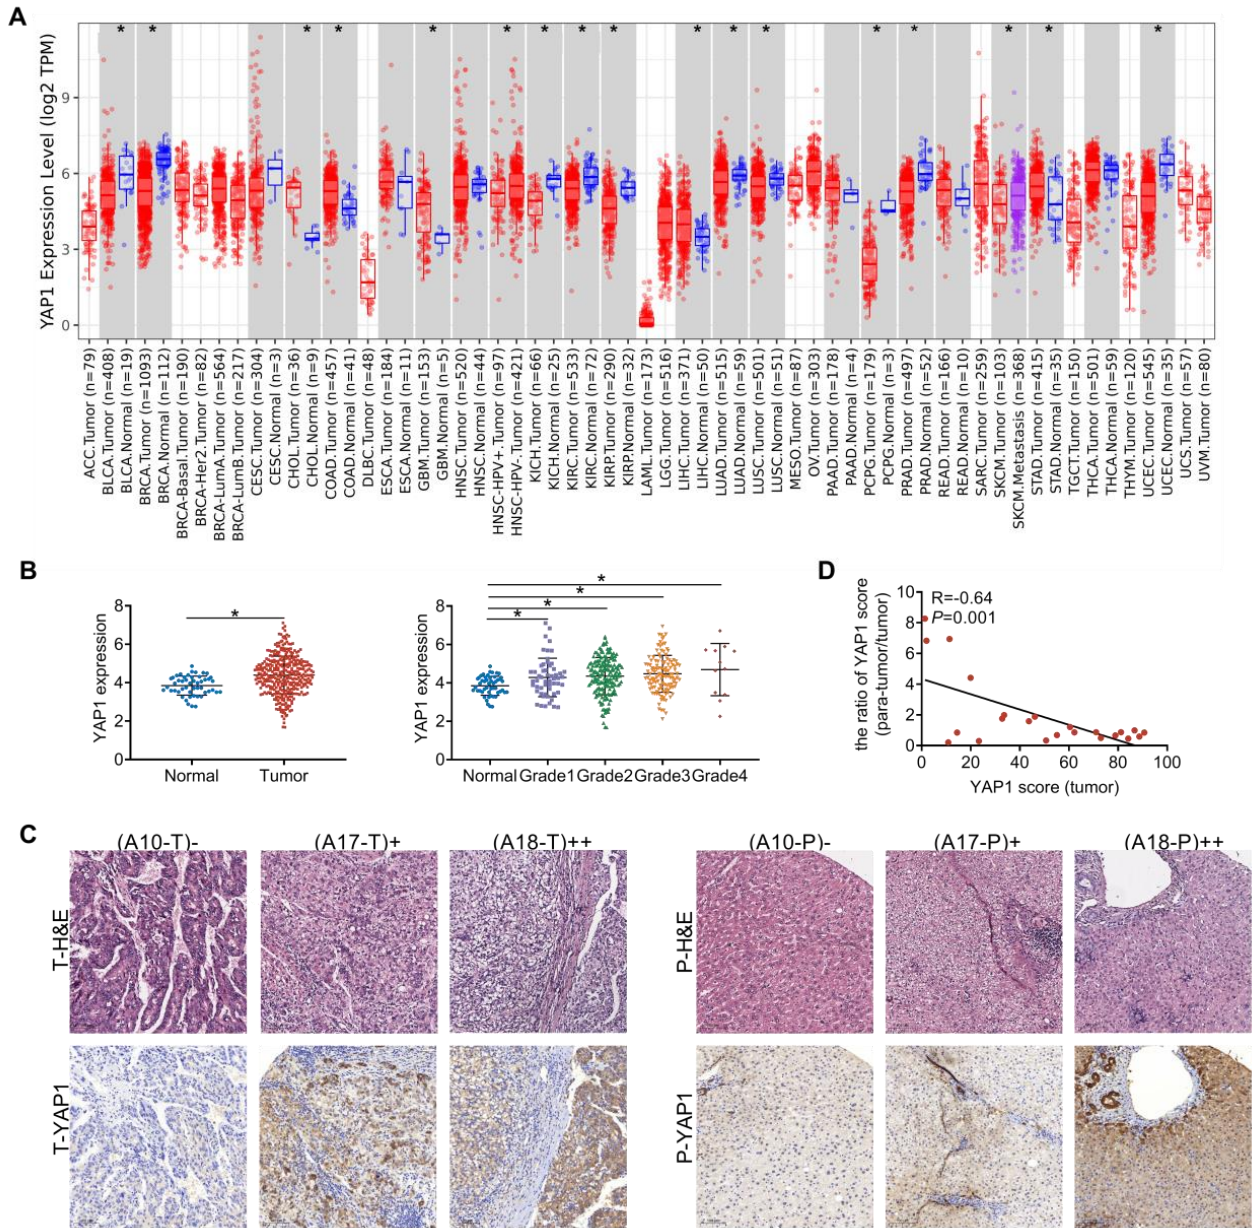

612

613

614

615

616

617

618 **Figure 1 Different expression of YAP1 in tumor and para-tumor tissues from HCC patients.**

619 A. Pan-cancer analysis of *YAP1* mRNA expression levels in different tumors by TIMER database.

620 \* $P < 0.05$  vs corresponding normal control group.

621 B. The mRNA expression levels of *YAP1* in HCC tumor (T, n=371) and normal tissues (N, n=50) ,

622 and *YAP1* expression in different HCC grades based on the TCGA database. \* $P < 0.05$  vs the

623 normal tissues.

624 C. YAP1 expression in tumor (T) and para-tumor tissues (P) by the HCC tissue microarray. A10,

625 A17 and A18 indicate patient number.

626 D. Analysis the relevance of the ratio of YAP1 (para-tumor /tumor tissues) with clinical tissue

627 microarray.

628

629

630

631

632

633

634

635

636

637

638



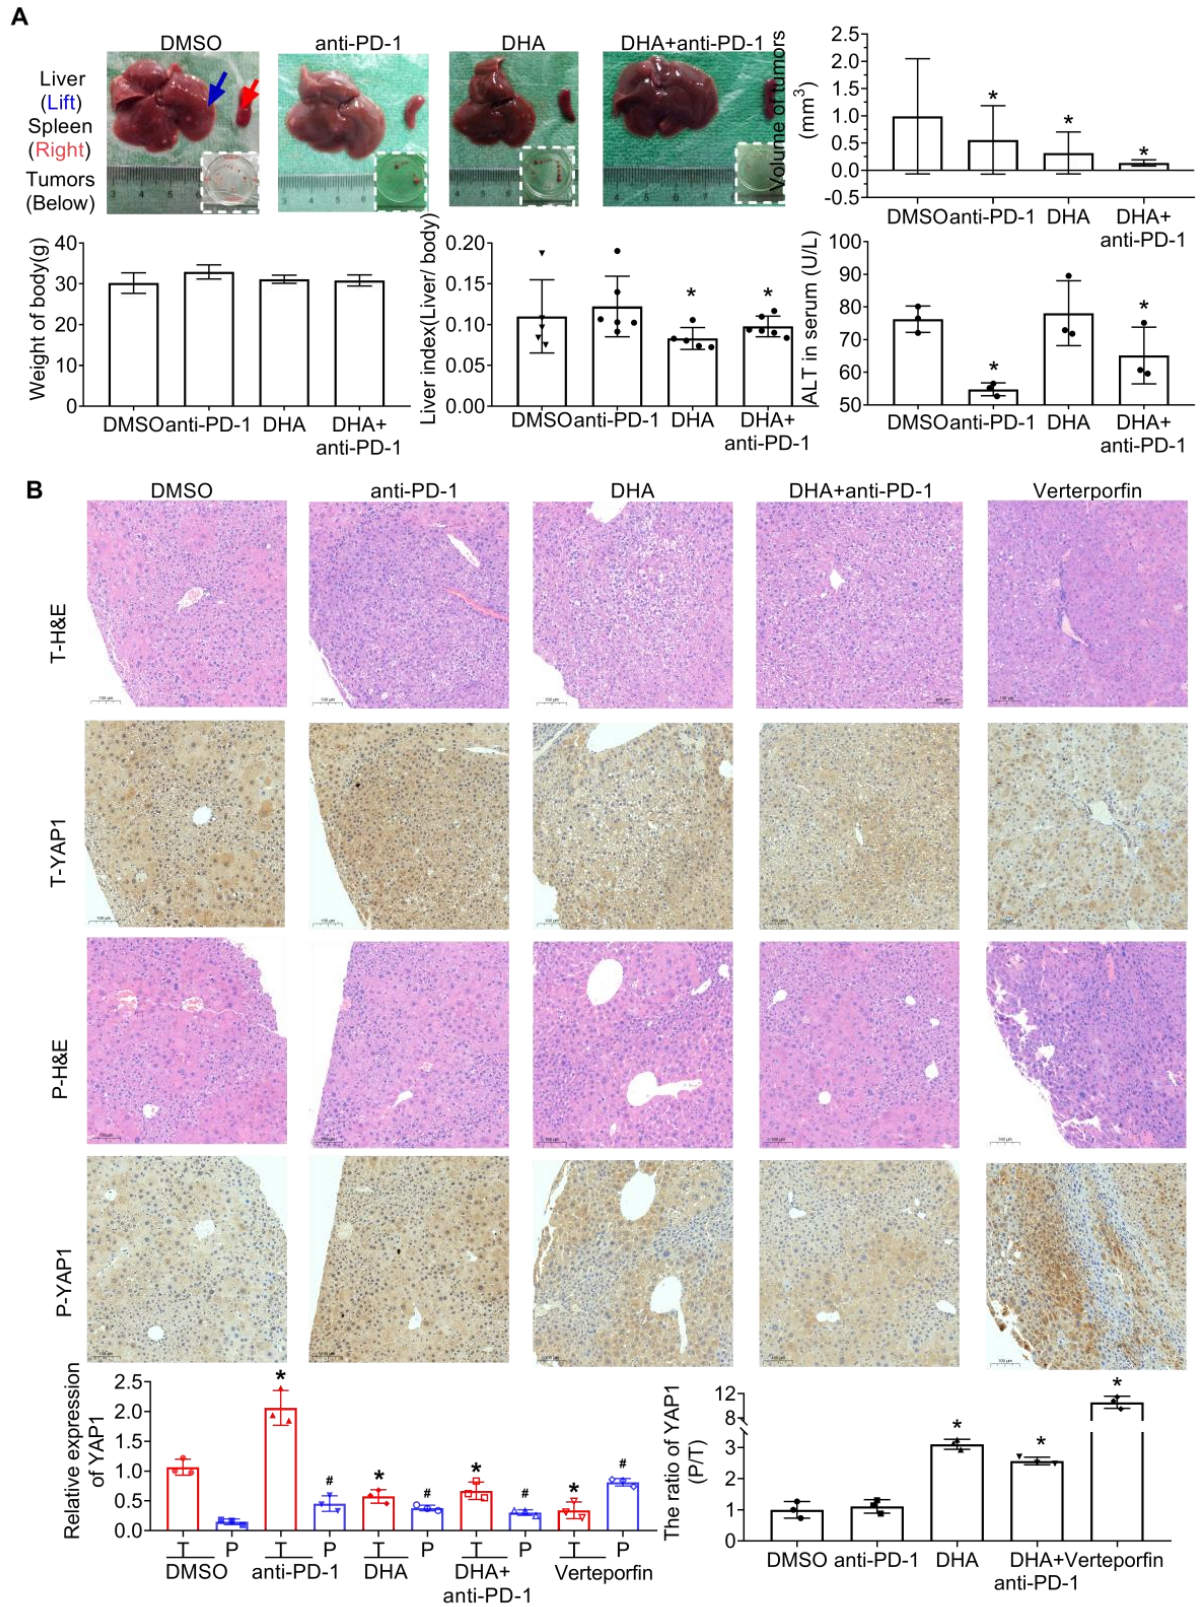

639

640

641



642 **Figure 2 DHA inhibited YAP1 expression in liver tumor mice.**

643 A. Representative images of the liver tumor, and tumorigenesis of DHA (25mg/kg) and/or  
644 anti-PD-1 (10mg/kg) in DEN/TCPOBOP-induced liver tumor C57BL/6 mice (n=6). \**P* <0.05 vs  
645 DMSO group.

646 B. IHC staining results of YAP1 in liver tumor (T) and para-tumor (P) in mice with liver tumors *in*  
647 *situ*. \**P* <0.05 vs liver tumor tissues, and #*P* <0.05 vs para-tumor tissues from DMSO group.

648

649

650

651

652

653

654

655

656

657

658

659

660

661

662

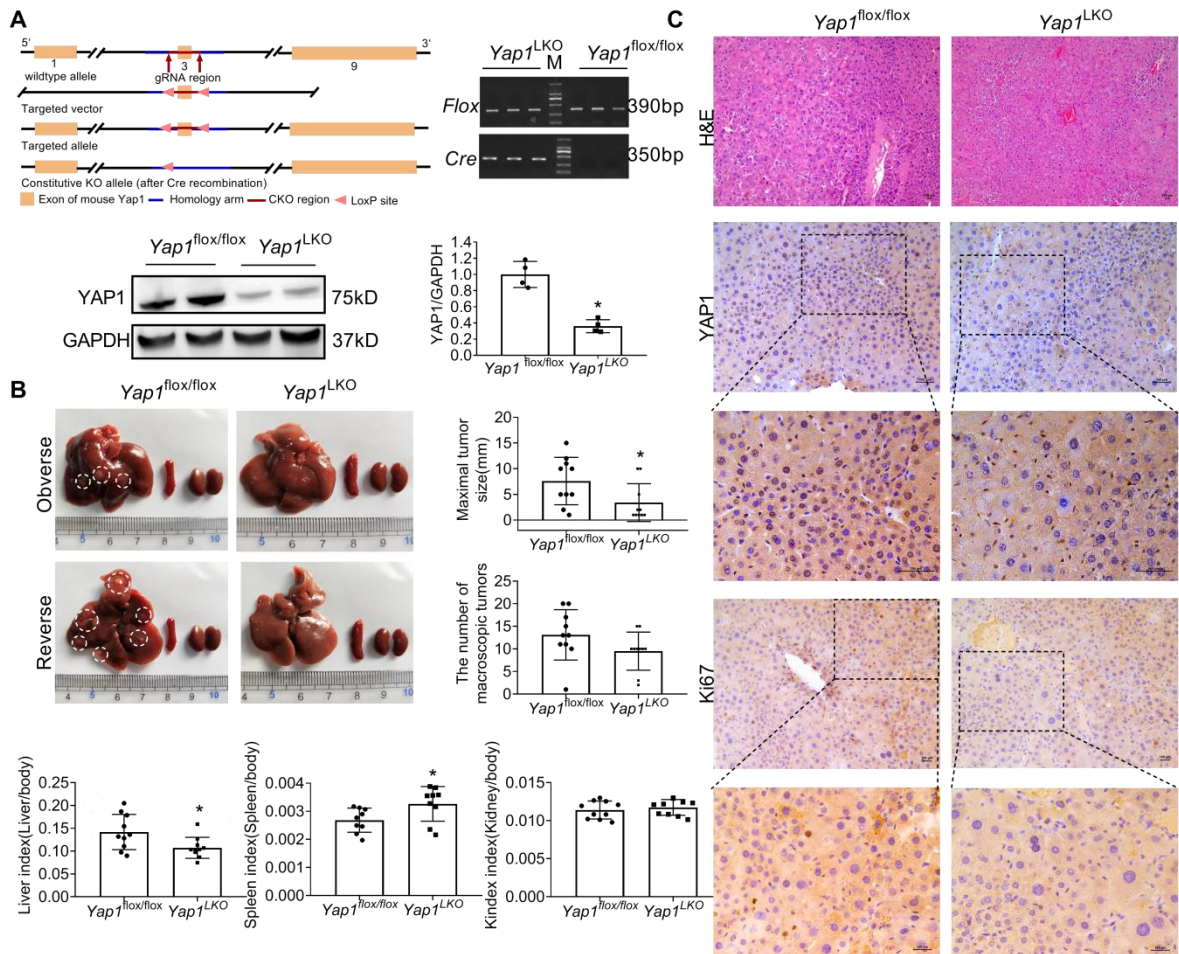

663

664

665

666

667

668

669

670

671

672

673 **Figure 3 *Yap1* knockout inhibited liver tumor growth *in vivo*.**

674 A. Diagram of *Yap1* knockout, genotype identification from the tail, and YAP1 expression of the

675 liver in *Yap1*<sup>LKO</sup> mice.

676 B. Effect of *Yap1* on tumorigenesis of liver during DEN/TCPOBOP induced tumor in mice

677 (n=9-12).

678 E. IHC staining results of YAP1 and Ki67 expression of liver tumor in *Yap1*<sup>LKO</sup> mice. \**P* < 0.05.

679

680

681

682

683

684

685

686

687

688

689

690

691

692

693

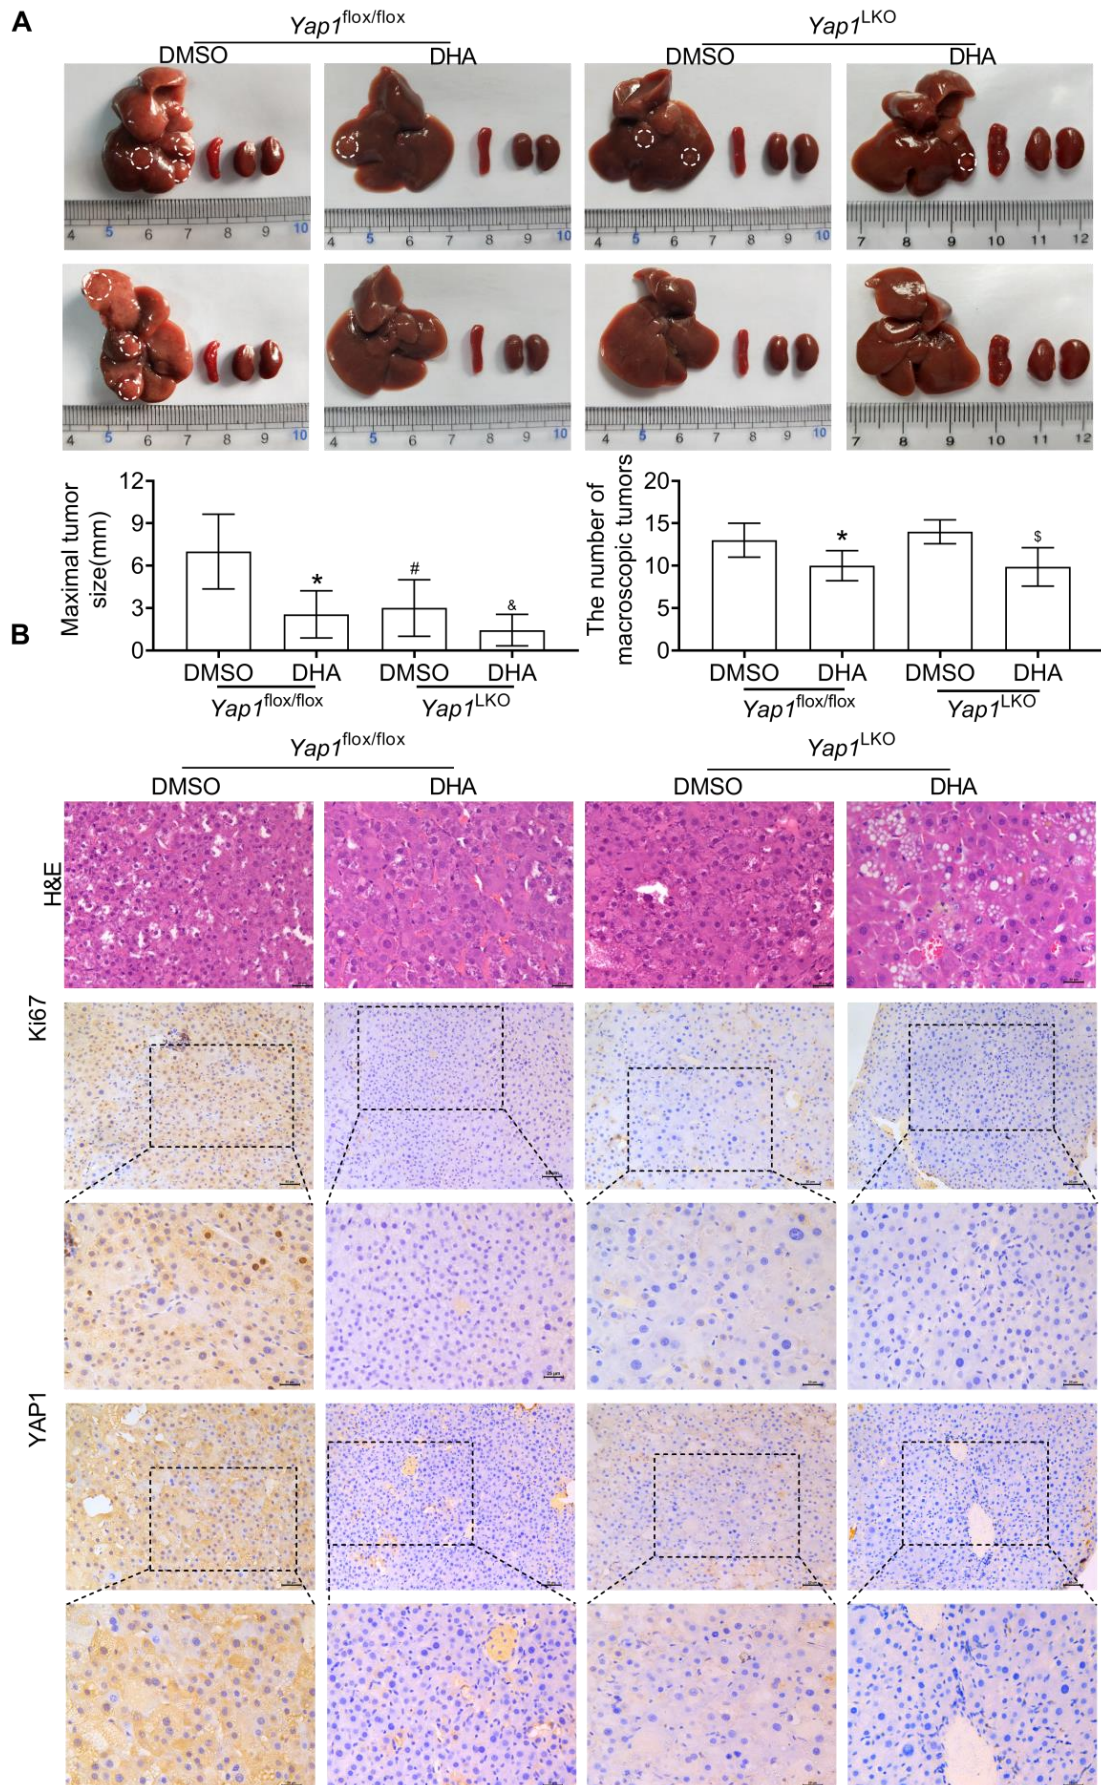



695 **Figure 4 DHA directly inhibited liver tumor growth through YAP1 in *Yap1*<sup>LKO</sup> mice.**

696 A. Effect of DHA on tumorigenesis of liver tumor in *Yap1*<sup>LKO</sup> mice (n=6). \* $P < 0.05$  *Yap1*<sup>flox/flox</sup>

697 +DMSO VS *Yap1*<sup>flox/flox</sup> +DHA; # $P < 0.05$  *Yap1*<sup>flox/flox</sup> +DMSO VS *Yap1*<sup>LKO</sup> +DMSO; & $P < 0.05$

698 *Yap1*<sup>flox/flox</sup> +DMSO VS *Yap1*<sup>LKO</sup> +DHA; \$ $P < 0.05$  *Yap1*<sup>LKO</sup> +DMSO VS *Yap1*<sup>LKO</sup> +DHA;

699 B. IHC staining of YAP1 and Ki67 in liver tumors of *Yap1*<sup>LKO</sup> mice.

700

701

702

703

704

705

706

707

708

709

710

711

712

713

714

715

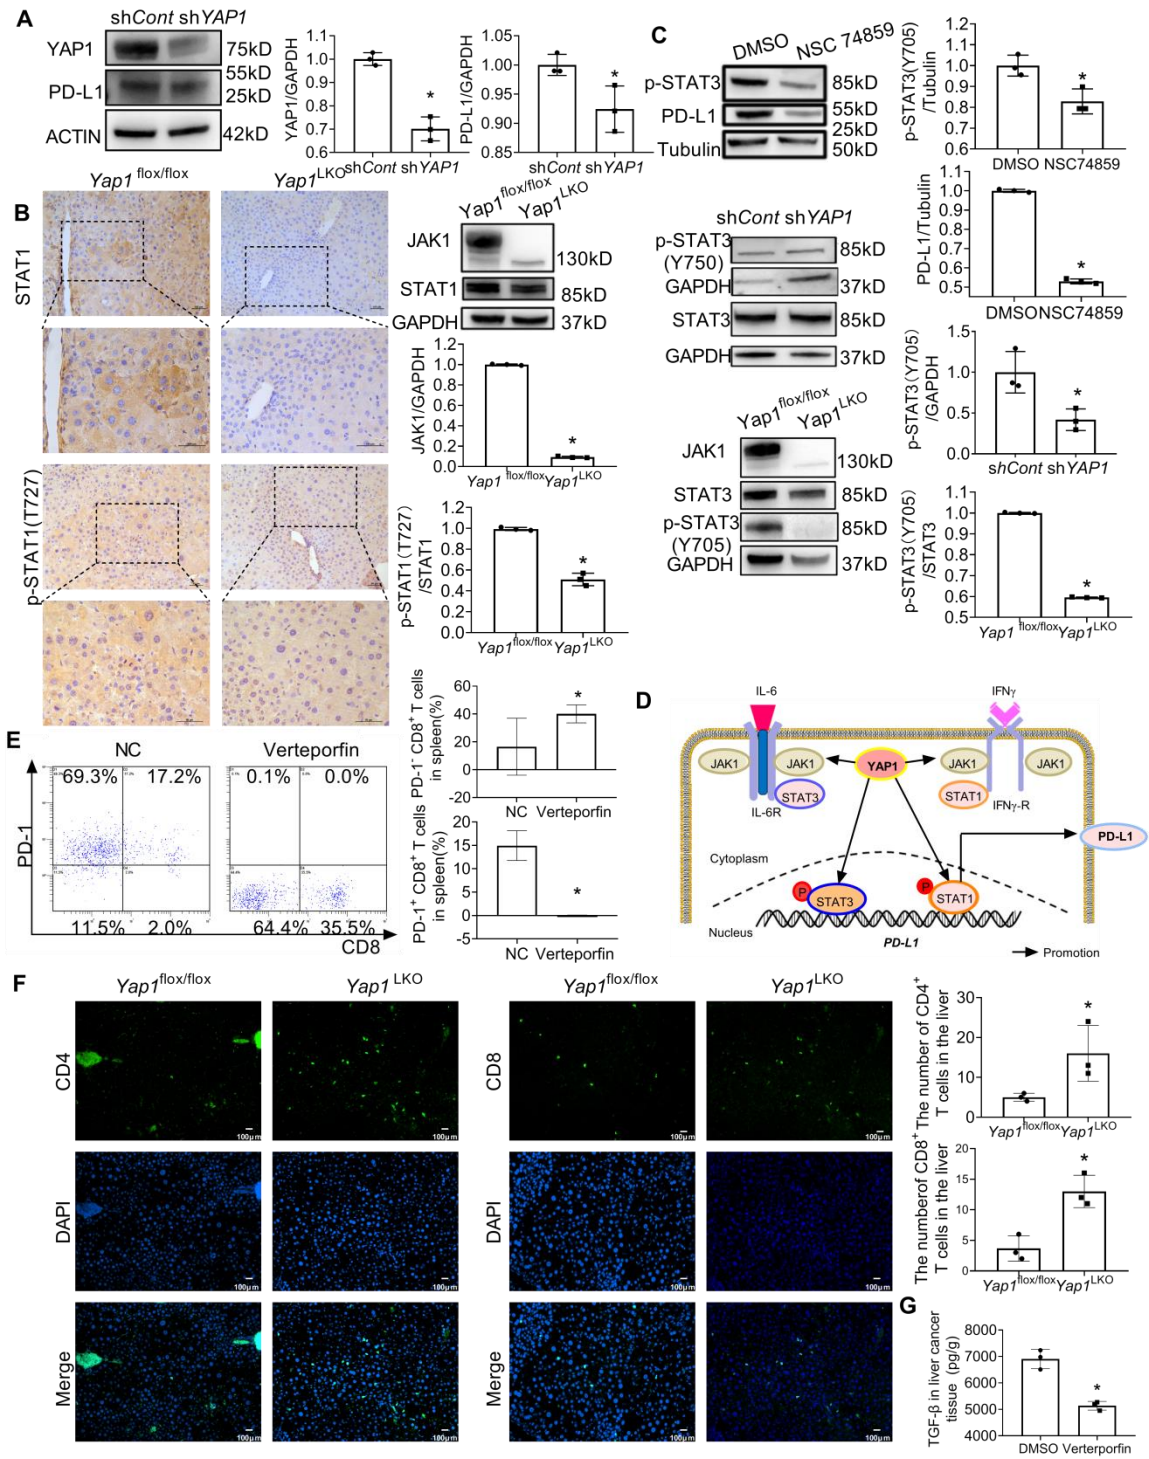

716

717

718

719

720 **Figure 5 YAP1 promoted PD-L1 expression to immune evasion by JAK1/STAT1, 3**

721 **pathways.**

722 A. YAP1 and PD-L1 expressions in shYAP1-HepG2215 cells. \* $P < 0.05$ .

723 B. IHC staining and Western blot results of JAK1, STAT1 and p-STAT1 (T727) in liver tumor of

724 *Yap1*<sup>LKO</sup> mice. \* $P < 0.05$ .

725 C. Western blot results of p-STAT3 (Y705) and PD-L1 in HepG2215 cells after treatment with

726 NSC-74859 for 24 h. JAK1, STAT3 and p-STAT3 (Y705) in shYAP1-HepG2215 cells and the liver

727 tumors in *Yap1*<sup>LKO</sup> mice. \* $P < 0.05$ .

728 D. YAP1 promoted PD-L1 expression by JAK1/STAT1,3 pathways.

729 E. Flow cytometry results of the percentage of PD-1<sup>-</sup>CD8<sup>+</sup> and PD-1<sup>+</sup>CD8<sup>+</sup> T cells in the spleen in

730 verteporfin-treated C57BL/6 mice.

731 F. IF results of CD8<sup>+</sup> T and CD4<sup>+</sup> T cells in the liver tumor tissues of *Yap1*<sup>LKO</sup> mice. \* $P < 0.05$  vs

732 DMSO group.

733 G. TGF- $\beta$  level in liver tissues in verteporfin-treated C57BL/6 mice by ELISA.

734

735

736

737

738

739

740

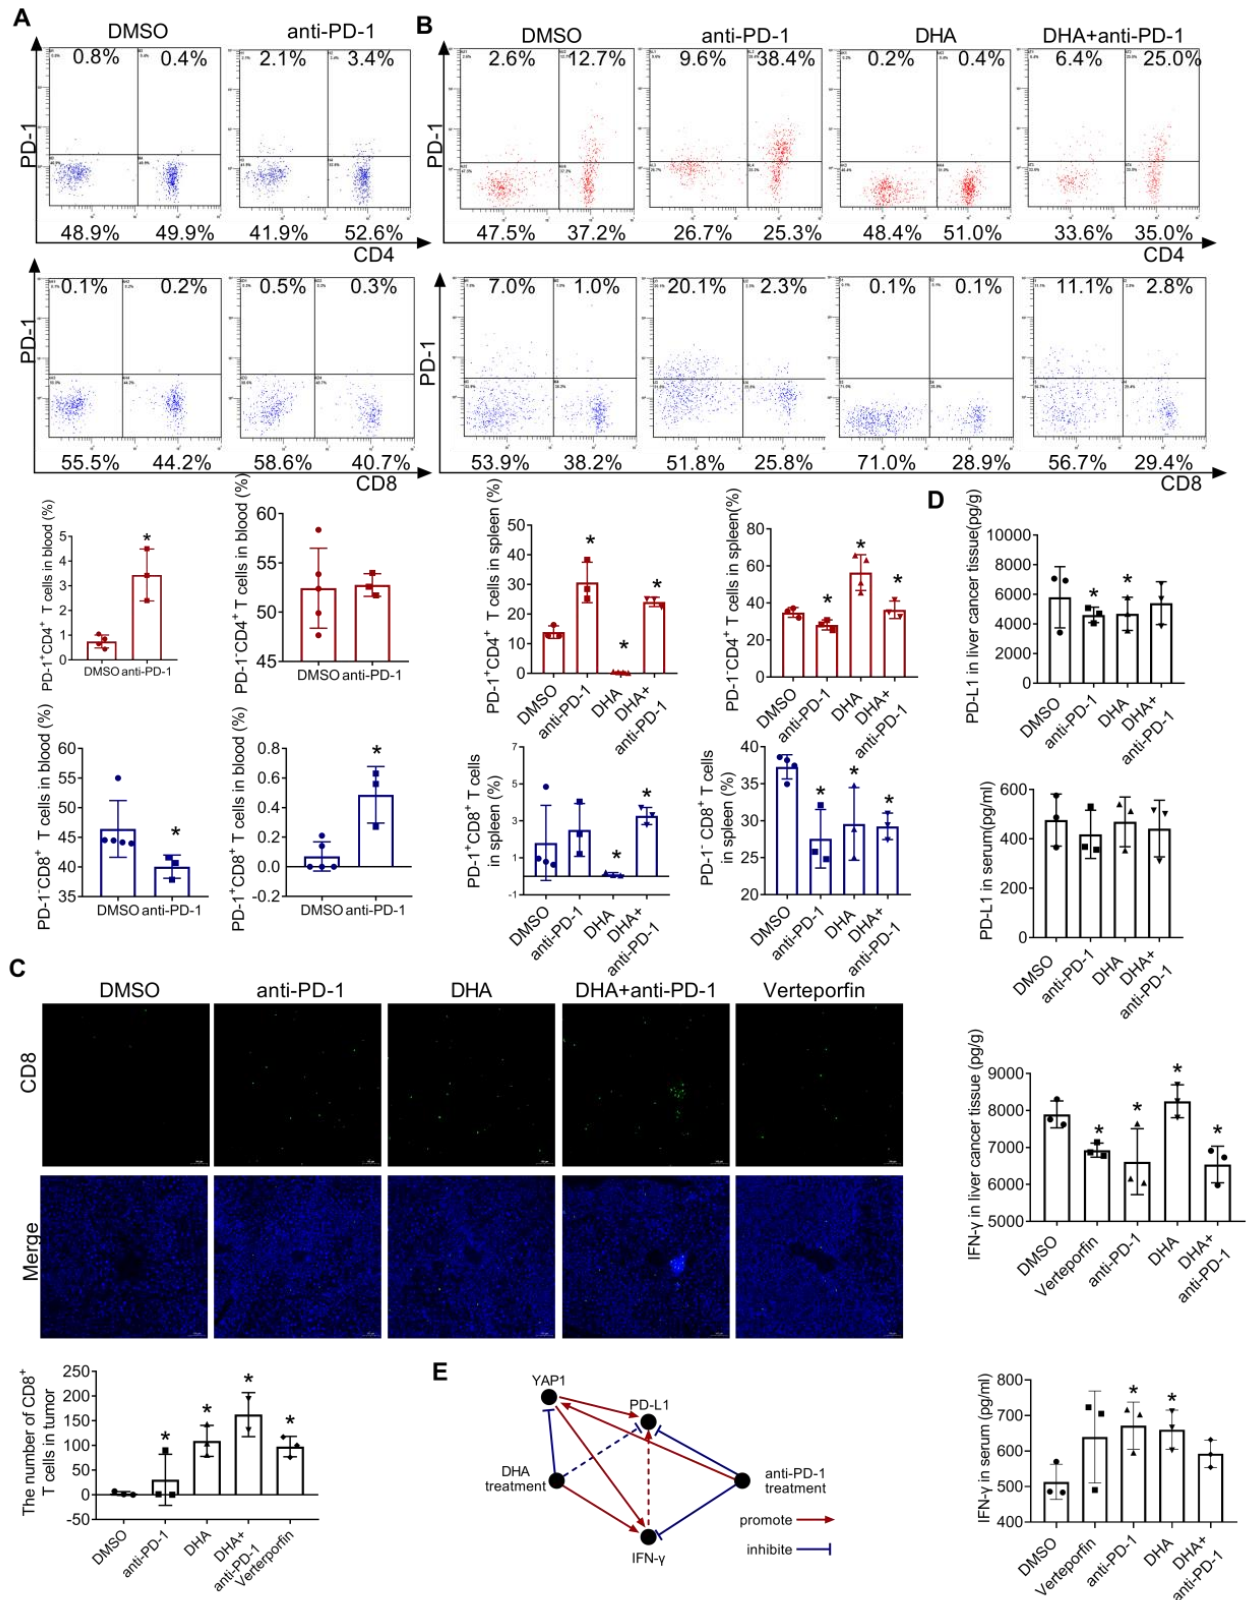

741

742

743



744 **Figure 6 DHA broke the tumor immunosuppressive niche.**

745 A. The percentage of exhausted T cells (PD-1<sup>+</sup>CD4<sup>+</sup> and PD-1<sup>+</sup>CD8<sup>+</sup>) in PBMC from  
746 anti-PD-1-treated C57BL/6 mice by flow cytometry. \**P* < 0.05 vs DMSO group.

747 B. Flow cytometry result of the percentage of PD-1<sup>-</sup> CD4<sup>+</sup>, PD-1<sup>+</sup>CD4<sup>+</sup>, PD-1<sup>-</sup> CD8<sup>+</sup> and PD-1<sup>+</sup>  
748 CD8<sup>+</sup> T cells in spleen from C57BL/6 mice after anti-PD-1 and/or DHA treatment. \**P* < 0.05 vs  
749 DMSO group.

750 C. IF results of CD8<sup>+</sup> T cells in the liver tumor tissues in anti-PD-1 and/or DHA or verteporfin  
751 treated mice. \**P* < 0.05 vs DMSO group.

752 D. IFN- $\gamma$  and PD-L1 in liver tumor tissues or in the serum by ELISA. \**P* < 0.05 vs DMSO group.

753 E. Schematic model of the regulatory pathway and mechanism of YAP1 and DHA in tumor  
754 immune evasion during anti-PD-1 therapy.

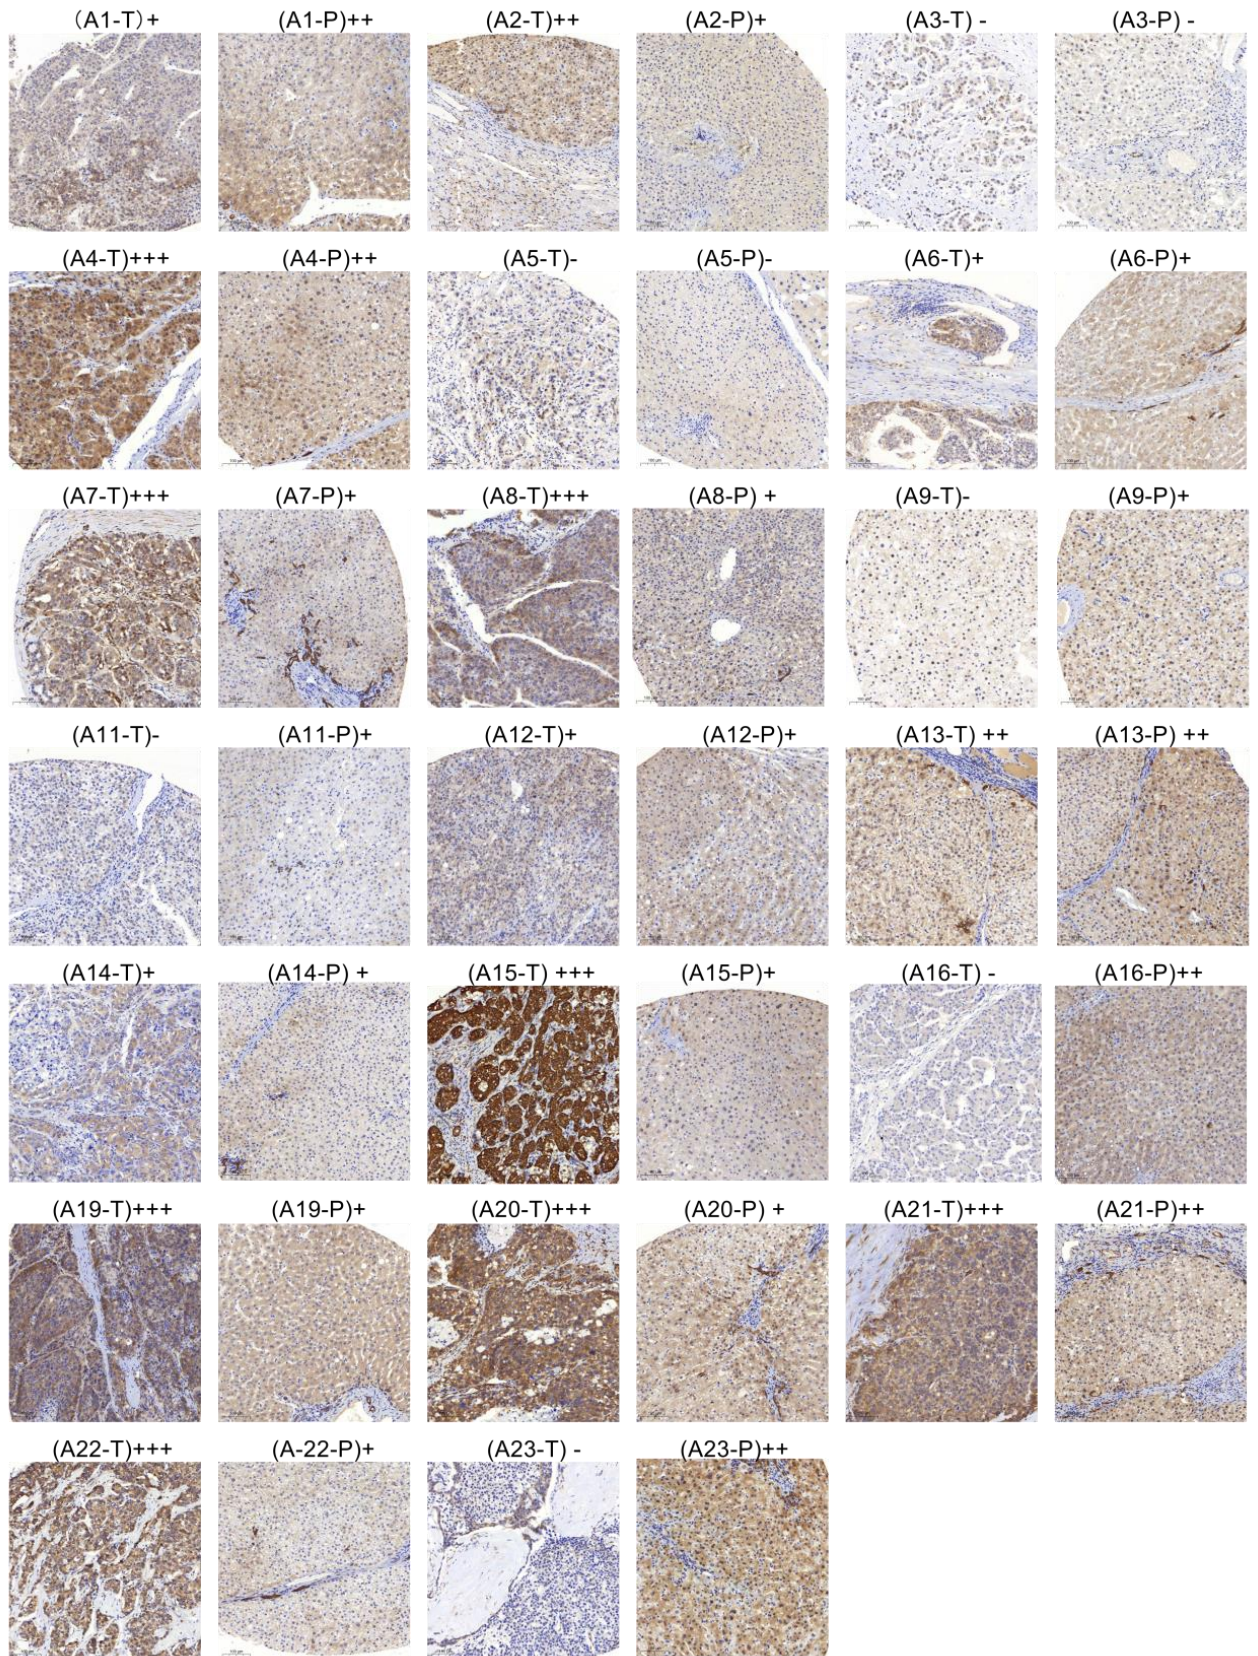

755

756

757 **Figure S1 The expression of YAP1 in tumor (T) and para-tumor tissues (P) by the HCC**

758 **tissue microarray. Axx indicate patient number.**

759

760

761

762

763

764

765

766

767

768

769

770

771

772

773

774

775

776

777

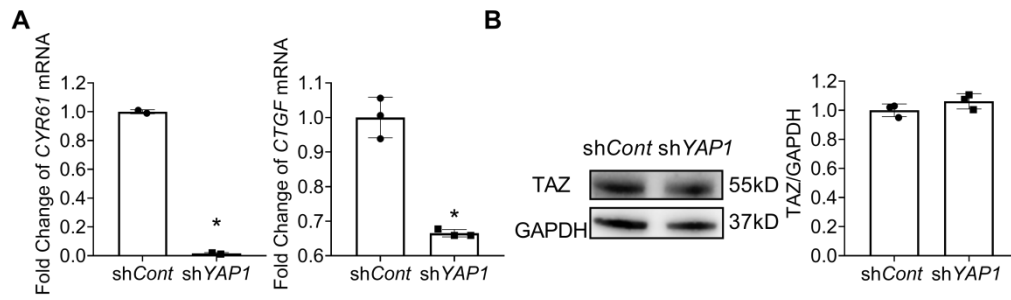

778

779

780

781

782

783

784

785

786

787

788

789

790

791

792

793

794

795



796 **Figure S2 YAP1 and the downstream genes CYR61 and CTGF were decreased, while TAZ**  
797 **did not change in shYAP1-HepG2215 cells.**

798 A. The relative mRNA levels of *CYR61* and *CTGF* in shYAP1-HepG2215 cells by q-PCR. \**P*  
799 <0.05 vs DMSO group.

800 B. Western blot results of TAZ of the liver tumor in shYAP1-HepG2215 cells.

801

802

803

804

805

806

807

808

809

810

811

812

813

814

815

816

817 Supplementary

818 **Table 1 Association of YAP1 expression with the clinicopathological factors of patients with HCC in tumor and peritumoral tissues expression in Human**  
 819 **HCC tumor tissue microarray.**

| Variable                              | YAP1 protein in tumor tissues (T-YAP1) |   |   |    |     | <i>P</i>     | YAP1 protein in peritumoral tissues (P-YAP1) |   |    |    |     | <i>P</i>     |
|---------------------------------------|----------------------------------------|---|---|----|-----|--------------|----------------------------------------------|---|----|----|-----|--------------|
|                                       | All patients                           | - | + | ++ | +++ |              | All patients                                 | - | +  | ++ | +++ |              |
| <b>Sex</b>                            |                                        |   |   |    |     | <b>0.758</b> |                                              |   |    |    |     | <b>1</b>     |
| Male                                  | 21                                     | 6 | 7 | 2  | 6   |              | 21                                           | 3 | 12 | 5  | 1   |              |
| Female                                | 3                                      | 1 | 0 | 1  | 1   |              | 3                                            | 0 | 2  | 1  | 0   |              |
| <b>Age</b>                            |                                        |   |   |    |     | <b>0.876</b> |                                              |   |    |    |     | <b>0.437</b> |
| ≥60                                   | 4                                      | 1 | 1 | 1  | 1   |              | 4                                            | 1 | 2  | 1  | 0   |              |
| <60                                   | 20                                     | 6 | 6 | 2  | 6   |              | 20                                           | 2 | 12 | 5  | 1   |              |
| <b>Histological grade</b>             |                                        |   |   |    |     | <b>0.325</b> |                                              |   |    |    |     | <b>1</b>     |
| I (well)                              | 7                                      | 3 | 2 | 1  | 1   |              | 7                                            | 1 | 3  | 3  | 0   |              |
| II (moderate)                         | 15                                     | 4 | 4 | 1  | 6   |              | 15                                           | 2 | 11 | 1  | 1   |              |
| III (poor)                            | 2                                      | 0 | 1 | 1  | 0   |              | 2                                            | 0 | 0  | 2  | 0   |              |
| <b>Maximum diameter of tumor (cm)</b> |                                        |   |   |    |     | <b>0.343</b> |                                              |   |    |    |     | <b>0.546</b> |
| <6                                    | 18                                     | 6 | 5 | 3  | 4   |              | 18                                           | 3 | 10 | 4  | 1   |              |
| ≥6                                    | 6                                      | 1 | 2 | 0  | 3   |              | 6                                            | 0 | 4  | 2  | 0   |              |
| <b>Intrahepatic satellite focus</b>   |                                        |   |   |    |     | <b>0.758</b> |                                              |   |    |    |     | <b>1</b>     |
| No                                    | 21                                     | 6 | 7 | 2  | 6   |              | 22                                           | 3 | 13 | 6  | 0   |              |
| Yes                                   | 3                                      | 1 | 0 | 1  | 1   |              | 2                                            | 0 | 1  | 0  | 1   |              |
| <b>Lymphatic metastasis</b>           |                                        |   |   |    |     |              |                                              |   |    |    |     |              |
| No                                    | 24                                     | 7 | 7 | 3  | 7   |              | 24                                           | 3 | 14 | 6  | 1   |              |
| Yes                                   |                                        |   |   |    |     |              |                                              |   |    |    |     |              |

**Table 2 Continued.**

|                                |    |   |   |   |   |       |    |   |    |   |   |       |
|--------------------------------|----|---|---|---|---|-------|----|---|----|---|---|-------|
| <b>Extrahepatic metastasis</b> |    |   |   |   |   |       |    |   |    |   |   |       |
| No                             | 24 | 7 | 7 | 3 | 7 |       | 24 | 3 | 14 | 6 | 1 |       |
| Yes                            | 0  | 0 | 0 | 0 | 0 |       | 0  | 0 | 0  | 0 | 0 |       |
| <b>HBV virus infection</b>     |    |   |   |   |   | 0.407 |    |   |    |   |   | 1     |
| No                             | 5  | 2 | 2 | 0 | 1 |       | 4  | 0 | 3  | 1 | 0 |       |
| Yes                            | 19 | 5 | 5 | 3 | 6 |       | 20 | 3 | 11 | 5 | 1 |       |
| <b>Cirrhosis</b>               |    |   |   |   |   | 0.311 |    |   |    |   |   | 1     |
| No                             | 12 | 5 | 2 | 1 | 4 |       | 12 | 2 | 8  | 2 | 0 |       |
| Yes                            | 12 | 2 | 5 | 2 | 3 |       | 12 | 1 | 6  | 4 | 1 |       |
| <b>Tumor stage</b>             |    |   |   |   |   |       |    |   |    |   |   |       |
| <b>T status</b>                |    |   |   |   |   | 0.288 |    |   |    |   |   | 0.526 |
| T1/T2                          | 15 | 5 | 5 | 2 | 3 |       | 16 | 3 | 10 | 3 | 0 |       |
| T3/T4                          | 9  | 2 | 2 | 1 | 4 |       | 8  | 0 | 4  | 3 | 1 |       |
| <b>N status</b>                |    |   |   |   |   |       |    |   |    |   |   |       |
| N0                             | 24 | 7 | 7 | 3 | 7 |       | 24 | 3 | 14 | 6 | 1 |       |
| N1                             | 0  | 0 | 0 | 0 | 0 |       | 0  | 0 | 0  | 0 | 0 |       |
| <b>M status</b>                |    |   |   |   |   |       |    |   |    |   |   |       |
| M0                             | 24 | 7 | 7 | 3 | 7 |       | 24 | 3 | 14 | 6 | 1 |       |
| M1                             | 0  | 0 | 0 | 0 | 0 |       | 0  | 0 | 0  | 0 | 0 |       |

821 Supplementary

822 **Table 2** Primers for cloning

| Primer Name    | Sequence (5' to 3')     |
|----------------|-------------------------|
| <i>Flox-F</i>  | GACCCAGACTGCTTGATAGATG  |
| <i>Flox-R</i>  | AAGAGCCCTAACAAAGACTG    |
| <i>Cre-F</i>   | GAAGCAGAAGCTTAGGAAGATGG |
| <i>Cre-R</i>   | TTGGCCCCTTACCATAACTG    |
| <i>ACTB-F</i>  | CATGTACGTTGCTATCCAGGC   |
| <i>ACTB-R</i>  | CTCCTTAATGTCACGCACGAT   |
| <i>YAP1-F</i>  | CCGTTTCCCAGACTACCTT     |
| <i>YAP1-R</i>  | TTGGCATCAGCTCCTCTC      |
| <i>CTGF-F</i>  | CAGCATGGACGTTTCGTCTG    |
| <i>CTGF-R</i>  | AACCACGGTTTGGTCCTTGG    |
| <i>CYR61-F</i> | CTCGCCTTAGTCGTCACCC     |
| <i>CYR61-R</i> | CGCCGAAGTTGCATTCCAG     |

823
